# Supplementary material for: Transition from exohedral to endohedral geometries of anionic and neutral B4Sin (n = 4–15) clusters: quantum chemical calculations
Source: Royal Society of Chemistry journal article supplement (doi:10.1039/c9cp05044b), 2019-01-01
Supplement: c9cp05044b1.pdf [file c9cp05044b1.pdf]

## ***Supporting Information***

### **Transition from exohedral to endohedral geometries of anionic and neutral $B_4Si_n$ ( $n = 4-15$ ) clusters: quantum chemical calculations**

Sheng-Jie Lu<sup>1,2\*</sup>

<sup>1</sup>*Department of Chemistry and Chemical Engineering, Heze University, Heze, Shandong Province,  
274015, China*

<sup>2</sup>*Beijing National Laboratory for Molecular Sciences, Beijing, 100190, China*

\* Corresponding authors. E-mail: lushengjie@iccas.ac.cn

## Theoretical method

CALYPSO is based on the generalization of particle swarm optimization (PSO). A large number of low-energy initial structures are randomly generated with the constraint of symmetries. The success of CALYPSO is due to the integration of several major techniques including structural evolution through PSO algorithm, symmetry constraint during structure generation, the Metropolis criterion, atom-centered symmetrical function, and bond characterization matrix (BCM), which can enhance the capability of CALYPSO in dealing with more complex systems and also reduce searching space, enhance the structural diversity, and eliminate similar structures on the potential energy surfaces to enhance searching efficiency. Here, structure predictions of anionic and neutral  $B_4Si_n$  ( $n = 4-15$ ) clusters are carried out. Cluster structures are ordered by generations in the particle swarm optimization method, in which each generation includes 100 structures, 70% of which are generated by the particle swarm optimization algorithm at the HSE06/6-31+G(d) level, while the others are generated randomly. Subsequently, we have picked out 40 generations to achieve convergence around the lowest minima of the potential energy surfaces. The searches can obtain a large database for low-energy anionic and neutral  $B_4Si_n$  ( $n = 4-15$ ) clusters. These low-energy structures within 2 eV of the global minimum structure are reoptimized with subsequent geometrical optimizations and frequency analyses at the HSE06/def2-TZVP level.

**Table S1.** Cartesian coordinates for stable isomers of  $B_4Si_{4-15}^-$  clusters.

| $B_4Si_4^-$ |             |             |             |    |             |             |             |
|-------------|-------------|-------------|-------------|----|-------------|-------------|-------------|
| 4A          |             |             |             | 4B |             |             |             |
|             | X           | Y           | Z           |    | X           | Y           | Z           |
| Si          | -0.81302827 | -1.54426951 | 0.00000000  | B  | 0.00003000  | -0.01580300 | -0.90401600 |
| Si          | 0.81302827  | 1.54426951  | 0.00000000  | B  | -0.90072700 | 1.37468100  | -0.53211400 |
| Si          | -2.45610215 | 0.43485217  | 0.00000000  | B  | 0.90030400  | 1.37494100  | -0.53269800 |
| Si          | 2.45610215  | -0.43485217 | 0.00000000  | Si | 0.00007100  | -1.79603800 | -0.04498100 |
| B           | -0.69869430 | 0.37665783  | -0.94439618 | Si | 0.00025600  | 0.46668500  | 1.27608600  |
| B           | -0.69869430 | 0.37665783  | 0.94439618  | Si | 1.95060400  | -0.30396100 | -0.21077000 |
| B           | 0.69869430  | -0.37665783 | -0.94439618 | Si | -1.95065500 | -0.30420700 | -0.21063800 |
| B           | 0.69869430  | -0.37665783 | 0.94439618  | B  | -0.00037800 | 2.69124000  | -0.29832500 |
| 4C          |             |             |             | 4D |             |             |             |
|             | X           | Y           | Z           |    | X           | Y           | Z           |
| B           | 0.47413100  | 0.00497500  | 1.04883300  | Si | -0.03944800 | 0.00164500  | 1.21312500  |
| B           | -0.96364900 | 0.80426600  | 0.85512600  | Si | -1.02637300 | 1.84490000  | -0.16275900 |
| B           | -0.94257500 | -0.83272900 | 0.84882200  | Si | 2.42998300  | 0.00020000  | -0.07069200 |
| Si          | 0.46627300  | 1.92408700  | 0.11204600  | Si | -1.02764700 | -1.84439600 | -0.16172600 |
| Si          | 0.51485600  | -1.91600600 | 0.11026500  | B  | -0.57524800 | -0.00115500 | -0.97957100 |
| Si          | -2.27702400 | -0.01939900 | -0.49816100 | B  | -1.90679800 | 0.00113300  | -0.04762900 |
| Si          | 1.88902500  | 0.02138100  | -0.47345500 | B  | 0.77003100  | 0.89166400  | -0.63443200 |
| B           | -0.22867100 | -0.00468800 | -0.65472900 | B  | 0.76977400  | -0.89821800 | -0.62862100 |
| $B_4Si_5^-$ |             |             |             |    |             |             |             |
| 5A          |             |             |             | 5B |             |             |             |
|             | X           | Y           | Z           |    | X           | Y           | Z           |
| B           | 0.46111300  | -0.01195400 | 0.86027000  | Si | 1.52037300  | -0.49670700 | 1.27274400  |
| B           | -1.11514000 | 0.16555600  | 0.23876000  | Si | -1.02520000 | 1.94020700  | 0.08108200  |
| B           | -0.33675900 | -1.39241700 | 0.26960300  | Si | 2.56736100  | 0.36021800  | -0.66332300 |
| Si          | 2.19728400  | 0.76642700  | 0.25744200  | Si | -0.83779700 | -1.87075500 | -0.39756500 |
| Si          | 0.46840700  | -0.08449900 | -1.38029300 | Si | -0.67311100 | 0.16633100  | -1.00212800 |
| Si          | 1.64695500  | -1.61908700 | 0.29341900  | Si | -0.34504200 | -0.06108600 | 0.77115200  |
| Si          | -0.02434500 | 1.87362700  | 0.19176500  | Si | 0.68779800  | 1.00932700  | -0.30610600 |
| B           | -1.93609800 | -1.35836000 | 0.15192000  | B  | 0.74226400  | -0.67296100 | -0.71184300 |
| Si          | -3.24298400 | -0.00890500 | 0.09461200  | B  | -2.37184700 | -0.09068100 | 0.15310600  |
| 5C          |             |             |             | 5D |             |             |             |
|             | X           | Y           | Z           |    | X           | Y           | Z           |
| B           | 0.75392200  | 0.25456600  | -0.99982700 | B  | 0.00067700  | -0.12780300 | -0.53979400 |
| B           | -0.82972200 | -0.20497800 | -0.87767000 | B  | -0.84269600 | 0.12769700  | 1.06332400  |
| B           | -0.41340100 | 1.35040300  | -0.37705700 | B  | 0.83897700  | 0.13537600  | 1.06000800  |
| Si          | 0.42878700  | -1.78829800 | -0.60025900 | Si | 1.57806700  | -1.54272100 | -0.14355700 |
| Si          | 1.37947000  | 1.82623500  | 0.26442800  | Si | 2.01350000  | 0.80810600  | -0.48474100 |
| Si          | -2.38836500 | 0.96658900  | -0.28038300 | Si | -2.03251700 | 0.79087400  | -0.46173100 |
| Si          | 2.24153900  | -0.44852600 | 0.24669000  | Si | -0.00494200 | 1.92065800  | 0.32591400  |
| B           | 0.20253600  | -0.02343100 | 0.72305600  | Si | -1.55392300 | -1.55955500 | -0.17201900 |
| Si          | -1.55905100 | -1.04762900 | 0.91648700  | B  | 0.00252200  | -1.30388400 | 1.03763900  |

$B_4Si_6^-$ 

| 6A |             |             |             | 6B |             |             |             |
|----|-------------|-------------|-------------|----|-------------|-------------|-------------|
|    | X           | Y           | Z           |    | X           | Y           | Z           |
| B  | 0.43526800  | 0.00030400  | -0.52820900 | B  | -0.38140500 | -0.17775200 | -0.70940700 |
| B  | 1.08269600  | -0.00123400 | 1.19902700  | B  | 0.85596100  | 0.45022000  | 0.43284700  |
| B  | -0.38802000 | -0.83109600 | 1.02577100  | B  | 0.24951100  | -1.21961500 | 0.61057400  |
| Si | -2.30232800 | 0.00104800  | 0.94020900  | Si | -2.29963600 | 0.49172400  | -0.75997900 |
| Si | -1.23770100 | -1.25290300 | -0.97361800 | Si | -1.12140700 | 0.36365400  | 1.43371200  |
| Si | 2.49712000  | -0.00021200 | -0.25572900 | Si | -1.66924600 | -1.68298900 | 0.12917700  |
| Si | 1.00656600  | -1.95952300 | 0.14584800  | Si | -0.34596600 | 1.91891300  | -0.35054400 |
| Si | 1.00683400  | 1.95926500  | 0.14670600  | B  | 1.80587800  | -0.98455900 | 0.88462600  |
| B  | -0.38693000 | 0.83163400  | 1.02663200  | Si | 2.95859600  | 0.43831000  | 0.35949300  |
| Si | -1.23585300 | 1.25246400  | -0.97599500 | Si | 1.57410700  | -0.83971600 | -1.24708800 |
| 6C |             |             |             | 6D |             |             |             |
|    | X           | Y           | Z           |    | X           | Y           | Z           |
| B  | 0.70903600  | -0.46869700 | 0.83478600  | B  | 0.86318900  | 0.21785300  | -0.92937400 |
| B  | -0.68577200 | 0.46482500  | 0.81538900  | B  | -0.78411700 | 0.46552000  | -0.60392000 |
| B  | -0.70918300 | -0.47073900 | -0.83796000 | B  | -0.15443700 | -1.14625900 | -0.86483900 |
| Si | 0.90530000  | 1.76074800  | 0.90661400  | Si | 2.53966900  | 0.67900500  | 0.06430700  |
| Si | 0.88946500  | -1.75882000 | -0.91548200 | Si | 0.65153300  | -0.32010000 | 1.24606900  |
| Si | -2.49589200 | -0.00221600 | 0.00490600  | Si | 1.79250800  | -1.59493800 | -0.65340300 |
| Si | 2.49615300  | -0.00365000 | -0.00679500 | Si | 0.43994400  | 1.96899000  | 0.03316600  |
| B  | 0.68620500  | 0.46671500  | -0.81816000 | B  | -1.74518000 | -0.94294400 | -0.96360200 |
| Si | -0.90353800 | 1.76345700  | -0.90450700 | Si | -2.87646800 | 0.56040700  | -0.63190700 |
| Si | -0.89159100 | -1.75669800 | 0.91738700  | Si | -1.89699200 | -0.79128300 | 1.14238800  |

 $B_4Si_7^-$ 

| 7A |             |             |             | 7B |             |             |             |
|----|-------------|-------------|-------------|----|-------------|-------------|-------------|
|    | X           | Y           | Z           |    | X           | Y           | Z           |
| B  | -0.74027100 | 0.44498200  | 0.61312800  | B  | 0.94830000  | -0.63144000 | 0.63530900  |
| B  | -0.71754900 | -0.74108400 | -0.91980200 | B  | -0.94856200 | 0.61913500  | 0.64191100  |
| B  | 0.61728500  | -1.15275200 | 0.17363000  | B  | -0.76714700 | -0.34614500 | -1.28859000 |
| Si | 2.35954800  | -0.09745100 | -0.19179400 | Si | 1.00716400  | 1.56277600  | 0.73733500  |
| Si | 0.85040300  | -0.03140600 | 1.95910100  | Si | 0.68597800  | -1.78822800 | -1.11093900 |
| Si | -2.56982800 | -0.28548200 | -0.26982000 | Si | -2.52097700 | 0.09202200  | -0.56352300 |
| Si | -1.10904800 | -1.46192100 | 1.28441600  | Si | 2.51944400  | -0.08956900 | -0.56619400 |
| Si | -1.21016800 | 1.61462600  | -1.00669000 | B  | 0.76607100  | 0.36095100  | -1.28816600 |
| B  | 0.54542100  | 0.46716100  | -1.00264200 | Si | -0.68837000 | 1.80186600  | -1.09039400 |
| Si | 0.71531900  | 2.00107200  | 0.43206900  | Si | -1.00665600 | -1.57030500 | 0.72781600  |
| Si | 1.06917300  | -1.38883300 | -1.80167900 | Si | 0.00389600  | -0.00945400 | 2.33001900  |
| 7C |             |             |             | 7D |             |             |             |
|    | X           | Y           | Z           |    | X           | Y           | Z           |
| Si | -2.16658700 | -1.85748100 | -0.37525100 | B  | 0.35130900  | 0.94254800  | -0.12425700 |
| Si | 1.37793400  | -1.91627900 | -0.29859700 | B  | 0.35118400  | -0.94991200 | -0.05886100 |
| Si | 0.92674100  | 0.00226300  | 1.34662900  | B  | -0.79214500 | 0.03354900  | 0.94387400  |
| Si | 2.90120200  | -0.00402100 | -0.12715400 | Si | 2.40184600  | 1.30656800  | -0.06516500 |
| B  | -0.37671000 | -0.86344700 | -0.59968400 | Si | 2.40569300  | -1.30524300 | 0.02074000  |
| B  | -0.37462600 | 0.86541200  | -0.59860400 | Si | 1.17696400  | 0.05758200  | 1.67734100  |
| B  | 1.05140200  | -0.00160500 | -0.91299400 | Si | -2.72882500 | 0.04050300  | 1.13985300  |
| B  | -1.84763100 | 0.00304200  | -0.93976300 | Si | -1.59377900 | 1.55023800  | -0.40845300 |
| Si | -2.16084100 | 1.86292800  | -0.36555200 | Si | -0.50846100 | -0.06845600 | -1.91668300 |
| Si | -1.71071900 | -0.00200300 | 1.21729000  | Si | -1.59390200 | -1.57536500 | -0.29450100 |
| Si | 1.38497200  | 1.91337800  | -0.30770600 | B  | 1.32295600  | -0.04250000 | -1.18952400 |

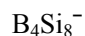

| 8A |             |             | 8B          |    |             |             |             |
|----|-------------|-------------|-------------|----|-------------|-------------|-------------|
|    | X           | Y           | Z           |    | X           | Y           | Z           |
| B  | 0.91868900  | 0.05064700  | -0.49094600 | B  | 0.08235300  | -1.42174400 | 0.39245300  |
| B  | 0.85437700  | -0.06279000 | 1.35559200  | B  | 1.10690700  | 0.36288200  | 0.64394900  |
| B  | -0.11882200 | -1.20376400 | 0.53240600  | B  | -0.43843500 | -0.02464600 | 1.34368000  |
| Si | -2.05994800 | -1.26921300 | -0.02869900 | Si | -2.08129000 | 1.08206300  | 1.21989400  |
| Si | -0.08031900 | -1.45168200 | -1.61315900 | Si | -1.93704100 | -1.24218600 | 0.24594700  |
| Si | 2.69824600  | 0.40528700  | 0.67170300  | Si | 1.97865500  | -1.29789800 | -0.31193800 |
| Si | 1.73863900  | -1.79047300 | 0.07008300  | Si | 1.16305400  | -1.09477400 | 2.08733800  |
| Si | 1.13914400  | 2.13077500  | -0.40967600 | Si | 1.54469600  | 2.37006400  | 0.19305200  |
| B  | -0.26733900 | 1.09079200  | 0.56946700  | B  | -0.18799900 | 1.45901100  | 0.31303500  |
| Si | -0.55649700 | 0.95711600  | -1.67427300 | Si | 0.90338900  | 0.79218800  | -1.52252500 |
| Si | -1.10563800 | -0.11957400 | 2.07464300  | Si | -0.25586500 | -1.44726100 | -1.67416500 |
| Si | -2.26895000 | 1.18244800  | 0.20705100  | Si | -1.51660800 | 0.70369500  | -1.19943000 |
| 8C |             |             | 8D          |    |             |             |             |
|    | X           | Y           | Z           |    | X           | Y           | Z           |
| B  | 0.09661100  | 0.90985400  | 0.45425900  | B  | 0.39238700  | -0.52562900 | -1.29241400 |
| B  | -1.06230200 | 0.00293200  | -1.53952700 | B  | -1.00530800 | -1.22163400 | -0.69725000 |
| B  | 0.09726400  | -0.91062200 | 0.45085500  | B  | -0.68952900 | 0.41975600  | 0.11151500  |
| Si | 2.01520900  | -1.34009000 | -0.31396900 | Si | 0.67513200  | -2.40059000 | 0.00570100  |
| Si | 1.45544000  | -0.00376300 | 1.84762600  | Si | 1.95313500  | 1.32359600  | 0.16179400  |
| Si | -1.97627700 | 1.31967300  | 0.12353000  | Si | -2.67883800 | -0.40462400 | -0.13339700 |
| Si | -0.99540700 | -0.00419000 | 1.99359100  | Si | 2.30584900  | -0.83789300 | -0.98655700 |
| Si | -0.21614500 | 1.89936400  | -1.43384300 | B  | 0.90265200  | -0.42255100 | 0.55115100  |
| B  | 0.57493500  | 0.00175700  | -1.00547800 | Si | -0.83773200 | -1.15034700 | 1.63906700  |
| Si | 2.01420900  | 1.34196300  | -0.30948500 | Si | -1.20888100 | 0.62685800  | -1.88087700 |
| Si | -0.21603400 | -1.89399100 | -1.44045600 | Si | -0.28565900 | 2.39348600  | -0.21944300 |
| Si | -1.97617600 | -1.32036600 | 0.11868100  | Si | 0.21977900  | 1.07453500  | 1.88764000  |

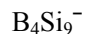

| 9A |             |             |             | 9B |             |             |             |
|----|-------------|-------------|-------------|----|-------------|-------------|-------------|
|    | X           | Y           | Z           |    | X           | Y           | Z           |
| B  | -0.58823100 | 0.63337300  | 0.69523000  | B  | 0.18036000  | -0.90426900 | 0.92939400  |
| B  | -0.57207900 | 0.31045000  | -1.02394200 | B  | 1.16661800  | -0.00014800 | -0.16442100 |
| B  | -0.29784400 | -1.01430100 | 0.12179000  | B  | 0.18085500  | 0.90459400  | 0.92922900  |
| Si | 1.69880000  | -1.77461600 | 0.36852900  | Si | -0.11011000 | -1.33621400 | -1.26232900 |
| Si | 0.34564200  | -0.58321100 | 2.08388800  | Si | -1.27852900 | 0.00037500  | 2.15197600  |
| Si | -2.44352700 | 1.05132000  | -0.34488500 | Si | 1.83102300  | 1.93094900  | 0.23187700  |
| Si | -2.03881200 | -0.84616700 | 1.36040100  | Si | -1.61491000 | -1.93345500 | 0.58224500  |
| Si | -0.30618200 | 2.40310700  | -0.47815300 | B  | -2.05410500 | 0.00106300  | 0.17085300  |
| B  | 0.98030000  | 0.96919900  | -1.16085300 | Si | -0.10888600 | 1.33394000  | -1.26383300 |
| Si | 1.31829600  | 1.48100100  | 1.09716300  | Si | 3.27515500  | -0.00053100 | -0.05935200 |
| Si | 0.75437000  | -1.08437000 | -1.77016500 | Si | 1.82956500  | -1.93150400 | 0.23430200  |
| Si | 2.76490600  | 0.33051500  | -0.60416400 | Si | -2.02243200 | 0.00132300  | -1.86567400 |
| Si | -1.92283100 | -1.29854900 | -1.22412300 | Si | -1.61292300 | 1.93467400  | 0.58469600  |
| 9C |             |             |             | 9D |             |             |             |
|    | X           | Y           | Z           |    | X           | Y           | Z           |
| B  | -0.85610800 | 0.51358000  | 0.70291900  | B  | 0.78353600  | 0.17587500  | -0.45468500 |
| B  | -0.51382400 | -1.03884200 | -0.02143200 | B  | 0.32258600  | 0.47836600  | 1.22866700  |
| B  | 0.95452300  | -0.53504300 | -1.19109700 | B  | -0.03712700 | -1.11501900 | 0.55428100  |
| Si | 1.33432100  | 1.50960600  | -1.23660300 | Si | -1.96538100 | -1.59037900 | -0.18897200 |
| Si | 0.88222100  | 1.64671100  | 1.33485300  | Si | 0.20759800  | -1.46432800 | -1.52432100 |
| Si | -2.10943700 | -1.01118800 | 1.38246200  | Si | 2.22582700  | 1.26576300  | 0.70888700  |
| Si | 0.28481000  | -0.67960700 | 1.94183500  | Si | 1.81801800  | -1.22865100 | 1.25602400  |
| Si | -2.51628400 | 0.45098300  | -0.59967500 | Si | 0.24142600  | 2.23642800  | -0.31443700 |
| B  | -0.49615100 | 0.31119700  | -1.14331300 | B  | -1.13142900 | 1.31020000  | 0.76733700  |
| Si | -0.86646500 | 2.28304300  | -0.43163600 | Si | -0.94823600 | 0.66784500  | -1.75677500 |
| Si | -0.40650700 | -1.70892700 | -2.03215300 | Si | -1.49305500 | -0.39399300 | 1.93157800  |
| Si | 1.23232000  | -2.18750000 | 0.02780000  | Si | -2.83865200 | 0.72253400  | -0.01216200 |
| Si | 2.49057700  | -0.03558300 | 0.20344700  | Si | 2.77475300  | -0.51858400 | -0.84825200 |

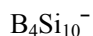

| 10A |             |             |             | 10B |             |             |             |
|-----|-------------|-------------|-------------|-----|-------------|-------------|-------------|
|     | X           | Y           | Z           |     | X           | Y           | Z           |
| B   | -0.19949500 | 0.85970300  | -0.80317200 | B   | 0.47914100  | -0.91201100 | 0.64130800  |
| B   | -0.19636400 | -0.86089800 | -0.79190600 | B   | 0.53676900  | 0.82850900  | 0.25240700  |
| B   | -1.06909700 | 0.00364700  | 0.55013900  | B   | -0.81739400 | 0.89437600  | -1.05611100 |
| Si  | 1.61090100  | -1.89913000 | -0.12367900 | Si  | -1.55333800 | -0.95698000 | -1.65696400 |
| Si  | 3.35113000  | 0.00103500  | -0.17078900 | Si  | -1.61068500 | -1.45117800 | 1.04500400  |
| Si  | 1.60585700  | 1.89944300  | -0.12436800 | Si  | 2.24105500  | 0.00700300  | 1.44596700  |
| Si  | 1.47287700  | -0.00098500 | -1.76738900 | Si  | -0.14243600 | 0.27078000  | 2.21735400  |
| Si  | -1.91916600 | -0.00431600 | -1.75456300 | Si  | 2.13645200  | -1.53755300 | -0.59461900 |
| Si  | -1.74341800 | -1.93825100 | 0.00995400  | B   | 0.42639300  | -0.32339900 | -1.05439200 |
| Si  | -3.20247600 | 0.00265800  | 0.33734600  | Si  | -0.09163000 | -2.57085100 | -0.46414400 |
| Si  | -1.73911800 | 1.94075400  | 0.00393400  | Si  | 0.36034800  | 2.52617700  | -1.15201400 |
| Si  | 0.23641300  | 1.18848900  | 1.82474400  | Si  | -1.10420800 | 2.06921900  | 0.72354300  |
| Si  | 0.23189800  | -1.19103400 | 1.81668000  | Si  | -2.74158200 | 0.48238600  | -0.17899400 |
| B   | 1.73123900  | 0.00129400  | 0.89970400  | Si  | 2.28284300  | 0.98689700  | -0.95056600 |
| 10C |             |             |             | 10D |             |             |             |
|     | X           | Y           | Z           |     | X           | Y           | Z           |
| B   | -0.49459000 | -0.66013500 | 0.77878800  | B   | -0.51698500 | 0.54866900  | -0.86733300 |
| B   | 1.00695400  | -0.46720400 | -1.41134200 | B   | 1.92716100  | -1.06623700 | 0.01348300  |
| B   | -0.81062800 | 0.91137500  | 0.02936900  | B   | -0.79836000 | -0.94654400 | 0.02422100  |
| Si  | -2.46795300 | 0.47139400  | -1.26557000 | Si  | 1.47410600  | 0.84142300  | 1.55024600  |
| Si  | -2.37868800 | 0.28642500  | 1.36113500  | Si  | -2.12281400 | 1.78890800  | -0.03667900 |
| Si  | 1.49901800  | -1.05930000 | 1.52615200  | Si  | 0.60380100  | -2.55518400 | 0.05470900  |
| Si  | 0.01116000  | 0.98539800  | 1.95219400  | Si  | 0.25855000  | 2.35560000  | -0.05800000 |
| Si  | 0.29581900  | -2.29770100 | -0.35238100 | B   | -0.50436700 | 0.59001000  | 0.83625100  |
| B   | -0.61762300 | -0.53386200 | -0.94748900 | Si  | -0.06825000 | -1.10626000 | 1.98260300  |
| Si  | -2.17653800 | -1.76657800 | -0.05336200 | Si  | -0.09905700 | -1.20764200 | -1.93640900 |
| Si  | -0.12213800 | 1.22105400  | -1.96794100 | Si  | -2.41029100 | -0.44848400 | -1.27693000 |
| Si  | 0.53192700  | 2.54150000  | 0.06567000  | Si  | -2.39728900 | -0.37587400 | 1.31735500  |
| Si  | 2.79149400  | -1.07232700 | -0.82346400 | Si  | 1.45591900  | 0.74320000  | -1.57672800 |
| Si  | 2.34300100  | 0.95793100  | 0.11137800  | Si  | 3.26695100  | 0.27649300  | -0.02253200 |

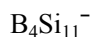

| 11A |             |             |             | 11B |             |             |             |
|-----|-------------|-------------|-------------|-----|-------------|-------------|-------------|
|     | X           | Y           | Z           |     | X           | Y           | Z           |
| B   | -0.03232300 | 0.30451900  | 1.26954700  | B   | 0.72454100  | -0.12672600 | -0.80411600 |
| B   | -1.07471000 | 0.74569300  | -1.21400600 | B   | -1.82002700 | -0.86243400 | 0.41874100  |
| B   | 0.72794300  | -0.93590900 | 0.24217800  | B   | 0.95998700  | 0.87353500  | 0.61276800  |
| Si  | 2.45119800  | 0.22301700  | -1.15786200 | Si  | 2.81619900  | 0.06994400  | 1.20997500  |
| Si  | 1.99006200  | 0.53134700  | 1.41141800  | Si  | 2.54235000  | 1.00405400  | -1.09058600 |
| Si  | -2.24047800 | 0.41274100  | 1.48316600  | Si  | -1.16042700 | -0.16296000 | -1.80913400 |
| Si  | -0.91572600 | -1.55727600 | 1.56820800  | Si  | 0.19716500  | 1.87206300  | -1.21910800 |
| Si  | -0.71719600 | 2.22803700  | 0.30983600  | Si  | 0.05432200  | -2.10410600 | -0.79287200 |
| B   | 0.47115000  | 0.75753000  | -0.38187300 | B   | 0.92357500  | -0.84650100 | 0.80267300  |
| Si  | 1.99339000  | 2.31506300  | -0.20224800 | Si  | 2.43593100  | -1.44408800 | -0.73779800 |
| Si  | 0.20396100  | -0.61676400 | -1.93270100 | Si  | -0.74776900 | 0.15451100  | 1.93789500  |
| Si  | -0.35263500 | -2.58515600 | -0.60327300 | Si  | -0.30079400 | 2.47087100  | 1.16090000  |
| Si  | -2.92166900 | 1.27662600  | -0.81971400 | Si  | -3.40763600 | -0.49943300 | -0.72731700 |
| Si  | -2.28217900 | -1.03777000 | -0.56027900 | Si  | -2.08243400 | 1.17341700  | 0.17880800  |
| Si  | 2.75839500  | -1.50123400 | 0.53350500  | Si  | -0.62836200 | -2.19065800 | 1.52135500  |
| 11C |             |             |             | 11D |             |             |             |
|     | X           | Y           | Z           |     | X           | Y           | Z           |
| B   | 0.71104200  | -0.51933200 | 0.62899100  | B   | -0.23155700 | -0.63035100 | 0.58663300  |
| B   | -0.21202300 | 0.97099100  | 0.27645200  | B   | 0.62080100  | 1.00141100  | 0.70232800  |
| B   | -1.47234600 | 0.38797300  | -0.96935200 | B   | -0.27720500 | 0.61505300  | -0.84053800 |
| Si  | -1.14401500 | -1.54564100 | -1.74287800 | Si  | 2.10318800  | -0.60379700 | -1.72815400 |
| Si  | -0.66902000 | -2.20625500 | 0.85984200  | Si  | -0.91414400 | -2.52458200 | -0.21502600 |
| Si  | 1.56462200  | 1.23706300  | 1.55702100  | Si  | -0.43051700 | 2.61263300  | -0.09118900 |
| Si  | -0.48104500 | 0.04792400  | 2.22278900  | Si  | 1.47931600  | -1.95049800 | 0.27824600  |
| Si  | 2.30437200  | 0.17193700  | -1.46042400 | B   | 0.14847300  | -0.99813400 | -1.14860300 |
| B   | 0.22725500  | -0.03762900 | -1.06510700 | Si  | 1.59628000  | 1.76719700  | -1.08710100 |
| Si  | 1.27004800  | -1.98925400 | -0.66637200 | Si  | -1.06430000 | 0.81835500  | 1.94573100  |
| Si  | -1.43838800 | 2.41087000  | -1.00188900 | Si  | -2.47490800 | -0.88259100 | 0.72919800  |
| Si  | -2.26959100 | 1.09466500  | 0.89840400  | Si  | -1.86381600 | -0.60989300 | -1.74498200 |
| Si  | -2.76301700 | -1.05919700 | -0.10068700 | Si  | 1.19278800  | -0.36473900 | 2.18254900  |
| Si  | 1.02633700  | 2.19322500  | -0.89672100 | Si  | -2.49150200 | 1.30228600  | -0.50629600 |
| Si  | 2.86615100  | -0.64176500 | 0.73413400  | Si  | 2.77457500  | 0.43992100  | 0.48708800  |



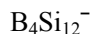

| 12A |             |             |             | 12B |             |             |             |
|-----|-------------|-------------|-------------|-----|-------------|-------------|-------------|
|     | X           | Y           | Z           |     | X           | Y           | Z           |
| Si  | 2.24366300  | 1.02888100  | 0.86409800  | B   | 0.81357400  | -0.71552200 | 0.73257900  |
| Si  | 3.03546000  | -0.35622100 | -0.93253700 | B   | -1.55143300 | 0.49398800  | -0.53498000 |
| Si  | 1.24429300  | 1.15362800  | -1.70455000 | B   | 0.05105800  | 0.85118100  | 0.30930100  |
| Si  | 1.91043300  | -2.35192300 | 0.08540400  | Si  | 1.74977400  | -0.05571100 | -1.67601600 |
| Si  | 0.74604400  | 2.69442600  | 0.17223100  | Si  | -0.68138700 | -2.20392200 | 0.82505100  |
| Si  | -0.36271000 | -2.20537500 | -0.86528600 | Si  | -2.69769600 | -0.65930700 | 0.96145900  |
| Si  | -1.94212500 | 1.50507100  | -1.45612200 | Si  | 1.60989000  | 2.07971500  | -0.55256300 |
| Si  | 1.05941900  | -0.78742600 | 1.79586800  | Si  | 1.89481600  | 0.98184300  | 1.60306500  |
| Si  | -1.54863400 | 2.06220600  | 1.10200800  | Si  | -2.11751100 | -1.38793900 | -1.24823900 |
| Si  | -1.31899300 | -0.16404100 | 2.18548800  | Si  | -0.21245300 | 0.02465300  | 2.41066800  |
| Si  | -2.24593800 | -1.84683800 | 0.65752600  | Si  | -0.95567400 | 0.27800200  | -2.50495300 |
| Si  | -2.41280200 | -0.79885900 | -1.57157200 | Si  | -0.86350800 | 2.45596700  | -0.83724700 |
| B   | -0.42112700 | -0.02536000 | -1.15613900 | Si  | -1.82300600 | 1.58786400  | 1.24964100  |
| B   | -1.70745300 | 0.18642900  | 0.12909800  | Si  | 1.40325500  | -2.30328100 | -0.53982500 |
| B   | 0.00635100  | 0.63090400  | 0.51138400  | Si  | 2.97874400  | -0.79603500 | 0.39723800  |
| B   | 0.97952300  | -0.60585400 | -0.41550000 | B   | -0.11187900 | -0.63482100 | -0.75407300 |
| 12C |             |             |             | 12D |             |             |             |
|     | X           | Y           | Z           |     | X           | Y           | Z           |
| B   | -0.06232700 | -0.91519300 | 0.97456300  | Si  | 1.86703800  | 1.51368400  | -1.28774300 |
| B   | 0.82363300  | -0.25706400 | -0.43610000 | Si  | -1.91380600 | 0.45382800  | -1.22489100 |
| B   | -0.59614600 | 0.82053000  | -0.92366600 | Si  | -0.52313600 | 2.45378700  | -1.37496700 |
| Si  | 1.43726400  | -0.10026100 | 2.34279800  | Si  | 0.89291700  | -2.27580800 | -0.57129700 |
| Si  | -1.43159000 | -0.96587200 | -1.87374900 | Si  | -2.25183000 | -1.57312900 | 0.52929300  |
| Si  | -0.89275800 | 0.41840800  | 2.40989800  | Si  | 1.79572800  | 1.48035500  | 1.10771700  |
| Si  | 1.62281700  | -2.04736000 | 0.52918700  | Si  | 2.94833400  | -0.84688600 | -1.02633300 |
| Si  | 2.38413900  | 1.20095800  | 0.36409200  | Si  | -0.56245800 | 2.20864400  | 1.35639900  |
| Si  | 0.55908200  | 0.20186600  | -2.52335600 | Si  | 2.50920600  | -0.72866100 | 1.46998100  |
| Si  | -2.77111200 | 0.60660200  | -0.75351900 | Si  | -3.20183700 | 0.57686100  | 0.78901200  |
| Si  | -0.70889500 | -2.66475300 | -0.08201400 | Si  | -0.12044500 | -1.55804300 | 1.73253900  |
| Si  | 0.60264100  | 2.62217200  | -0.69723600 | Si  | -1.37186300 | -1.78836400 | -1.74496500 |
| Si  | -2.20165600 | -1.12465200 | 0.89926600  | B   | -1.13975600 | 0.20611800  | 1.15687700  |
| Si  | 2.62134800  | -0.59246000 | -1.27167200 | B   | 0.01721900  | 0.94158300  | -0.13562500 |
| Si  | -1.38776900 | 2.23475600  | 0.54038000  | B   | -0.37025400 | -0.72634100 | -0.20505400 |
| B   | 0.30101100  | 0.94140000  | 0.70979300  | B   | 1.30281200  | -0.18691000 | -0.12948500 |

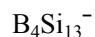

| 13A |             |             |             | 13B |             |             |             |
|-----|-------------|-------------|-------------|-----|-------------|-------------|-------------|
|     | X           | Y           | Z           |     | X           | Y           | Z           |
| B   | -1.38207000 | 0.78882800  | 0.00730500  | B   | 0.81768800  | -0.00273200 | -1.19722600 |
| B   | -0.22313200 | -0.19936300 | -0.87820200 | B   | -1.54097500 | 0.00140300  | 0.55315800  |
| B   | 1.41794000  | 0.08696800  | -0.00494200 | B   | -0.02326100 | -0.90334800 | 0.16474100  |
| Si  | -2.61339000 | -0.47063100 | 1.24743600  | Si  | 1.99613900  | 0.00042000  | 1.16868300  |
| Si  | 1.26446800  | 0.87324700  | -1.99089900 | Si  | -0.48835900 | 1.41938500  | -2.04891600 |
| Si  | -1.18872400 | 1.46191500  | 1.95549600  | Si  | -2.68742500 | -0.00749300 | -1.34055100 |
| Si  | -2.60812200 | -0.47428700 | -1.23611800 | Si  | 1.09041800  | -2.09143000 | 1.57374000  |
| Si  | -0.91999700 | -2.26325900 | 1.19287900  | Si  | 1.56702800  | -2.01851400 | -0.92449400 |
| Si  | 1.33296600  | -1.49558000 | -1.65263000 | Si  | -1.99950600 | 1.93594900  | -0.09232300 |
| Si  | 1.91061300  | 2.20526600  | 0.00242700  | Si  | -0.49217000 | -1.41675400 | -2.04991600 |
| Si  | -1.20287200 | 1.46833000  | -1.94264100 | Si  | -1.18229000 | 1.33988500  | 2.14557500  |
| Si  | 1.31926800  | -1.52521400 | 1.64218600  | Si  | -1.18459800 | -1.32192700 | 2.15546500  |
| Si  | -0.52288300 | 2.72345200  | 0.00640200  | Si  | -1.99377000 | -1.93856900 | -0.08010800 |
| Si  | -0.91054000 | -2.26364200 | -1.22080500 | Si  | 1.57832800  | 2.00843300  | -0.93049800 |
| Si  | 1.28322800  | 0.84405200  | 1.99206700  | Si  | 2.97702400  | -0.00711800 | -1.02569600 |
| B   | -0.21518600 | -0.19820200 | 0.87857700  | B   | -0.02630600 | 0.90735700  | 0.15849800  |
| 13C |             |             |             | 13D |             |             |             |
|     | X           | Y           | Z           |     | X           | Y           | Z           |
| B   | -0.28031400 | 0.09617200  | 1.06982200  | B   | 1.53975500  | 0.37751200  | -0.19378100 |
| B   | -0.14661300 | 0.68132800  | -0.64668900 | B   | -1.62927900 | 0.31789400  | 0.23951400  |
| B   | 0.48847700  | -0.57917500 | -1.74659000 | B   | 0.42970900  | -0.84497300 | -0.58580600 |
| Si  | -1.90675200 | 1.58046400  | 1.51510900  | Si  | 0.89900700  | -0.90249500 | 1.42976200  |
| Si  | 1.96379200  | -1.45356500 | -0.37602600 | Si  | 1.00239800  | 2.29263800  | -1.05590000 |
| Si  | -2.05990000 | -0.84751600 | 1.82973800  | Si  | -1.50910900 | 1.91368900  | -1.09233800 |
| Si  | 0.65663900  | 1.88816200  | 1.30916400  | Si  | 0.86851100  | -2.84533000 | 0.00105600  |
| Si  | -1.95042800 | 1.94836800  | -1.01874500 | Si  | 2.50617800  | -1.34703100 | -1.16255300 |
| Si  | 1.78475600  | 0.87065900  | -1.55690400 | Si  | -0.87167200 | 2.00978300  | 1.31618200  |
| Si  | 0.20650500  | -2.59740600 | -1.31424700 | Si  | 1.04253800  | 0.24055800  | -2.32802200 |
| Si  | 1.71212100  | -0.22346200 | 1.94291800  | Si  | -1.23175500 | -0.07784800 | 2.30241700  |
| Si  | -1.60392800 | -0.28148100 | -2.08086500 | Si  | -3.01098400 | -1.05960000 | 0.97385300  |
| Si  | 0.14218500  | -2.02564700 | 1.32635000  | Si  | -2.95243300 | -0.01684400 | -1.43751500 |
| Si  | 0.35843700  | 2.75104500  | -0.89837900 | Si  | 1.68690100  | 1.96039700  | 1.16919700  |
| Si  | -2.07832500 | -1.99371700 | -0.38984400 | Si  | 3.11815100  | -0.14053900 | 1.08437000  |
| B   | -1.65161300 | 0.08204900  | -0.01154900 | B   | -0.87433100 | -0.15667900 | -1.44650100 |

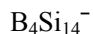

| 14A |             |             |             | 14B |             |             |             |
|-----|-------------|-------------|-------------|-----|-------------|-------------|-------------|
|     | X           | Y           | Z           |     | X           | Y           | Z           |
| B   | -1.44326100 | 0.90278900  | -0.15938300 | B   | -1.46443900 | 0.42504600  | -0.00050600 |
| B   | 0.25338300  | -1.43434800 | 0.14121400  | B   | -0.00010400 | -0.26521400 | -0.87349900 |
| B   | -0.04454300 | 0.01144500  | -0.88467800 | B   | 1.46323100  | 0.42457200  | 0.00051500  |
| Si  | 1.07596600  | 1.81076400  | -0.61376200 | Si  | -1.90004400 | -1.11197200 | 1.65487000  |
| Si  | -2.11689700 | 0.29070900  | 1.72465100  | Si  | 1.22636500  | 1.20280700  | -1.95946300 |
| Si  | -1.47914200 | -2.70268000 | -0.09197800 | Si  | -1.22537000 | 1.20006900  | 1.96087000  |
| Si  | 1.77943400  | 0.13408600  | -2.08669800 | Si  | -1.89931400 | -1.10613500 | -1.65698800 |
| Si  | -1.67643900 | 0.57891700  | -2.16308300 | Si  | -0.00097300 | -2.45727100 | 1.20054200  |
| Si  | -0.75896700 | -1.78287600 | 2.00545600  | Si  | 1.89909900  | -1.10846500 | -1.65484200 |
| Si  | -2.84808200 | -0.64735400 | -0.44153000 | Si  | 1.24528700  | 2.65891800  | 0.00227200  |
| Si  | 1.62551200  | -1.06149400 | 1.76898800  | Si  | -1.22334300 | 1.20528400  | -1.95939700 |
| Si  | 2.29930500  | -1.76254800 | -0.46173500 | Si  | 1.89862300  | -1.11150300 | 1.65435100  |
| Si  | 0.02278000  | -1.82782300 | -1.88027300 | Si  | -1.24465000 | 2.66038700  | 0.00205500  |
| Si  | -0.87054500 | 2.33894200  | 1.38254800  | Si  | -0.00067800 | -2.45598900 | -1.20615200 |
| Si  | -1.10753400 | 2.81982200  | -1.00939700 | Si  | 1.22596400  | 1.19994900  | 1.96130500  |
| B   | -0.09432100 | 0.14070500  | 0.90078900  | B   | -0.00130700 | -0.26490600 | 0.87429000  |
| Si  | 1.44725800  | 1.35630500  | 1.83095800  | Si  | 3.40766200  | -0.44554600 | 0.00060500  |
| 14C |             |             |             | 14D |             |             |             |
|     | X           | Y           | Z           |     | X           | Y           | Z           |
| B   | -1.44518000 | 0.40524500  | 0.00394100  | B   | -1.42734100 | 0.86348000  | -0.28420700 |
| B   | 0.00929800  | -0.26530500 | -0.87697100 | B   | -0.19014600 | -0.27904000 | -0.83143000 |
| B   | 1.48571800  | 0.33201600  | -0.00234800 | B   | 1.22546500  | -0.03893600 | 0.32881200  |
| Si  | -1.88748200 | -1.06671200 | 1.73186300  | Si  | -2.97681300 | -0.22186400 | 0.75672800  |
| Si  | 1.15839300  | 1.29987400  | -1.95576600 | Si  | 1.44329600  | 0.46795300  | -1.82220000 |
| Si  | -1.21727300 | 1.25887000  | 1.95352600  | Si  | -1.60365500 | 1.59921700  | 1.62653800  |
| Si  | -1.88530400 | -1.07273600 | -1.72819100 | Si  | -2.48565400 | -0.27943300 | -1.78491000 |
| Si  | -0.01124100 | -2.43329600 | 1.22723400  | Si  | -1.46769000 | -2.13487900 | 1.36225000  |
| Si  | 1.79156300  | -1.05402900 | -1.91608100 | Si  | 1.05204600  | -1.93299200 | -1.63451000 |
| Si  | 1.47965400  | 2.63125700  | 0.00128200  | Si  | 1.68288500  | 2.05587500  | 0.45136900  |
| Si  | -1.22680300 | 1.25547600  | -1.94938400 | Si  | -0.75260900 | 1.47309900  | -2.14369300 |
| Si  | 1.79071100  | -1.06319900 | 1.91318000  | Si  | 0.76683200  | -1.44310700 | 2.03470400  |
| Si  | -0.99187900 | 2.67826600  | 0.00052100  | Si  | -0.59041800 | 2.90680700  | -0.20195900 |
| Si  | -0.00574800 | -2.43362900 | -1.23067500 | Si  | -1.15408900 | -2.19154100 | -0.99969300 |
| Si  | 1.16733600  | 1.29082300  | 1.95490700  | Si  | 0.67633000  | 0.92509300  | 2.26970600  |
| B   | 0.01117000  | -0.26759000 | 0.87340000  | B   | -0.61621200 | -0.23449500 | 0.85714900  |
| Si  | 3.16452800  | -0.92029300 | -0.00156200 | Si  | 2.43926300  | -1.77864300 | 0.36616100  |

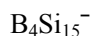

| 15A |             |             |             | 15B |             |             |             |
|-----|-------------|-------------|-------------|-----|-------------|-------------|-------------|
|     | X           | Y           | Z           |     | X           | Y           | Z           |
| B   | 1.47010900  | -0.61571800 | -0.08188100 | B   | 1.41758400  | 0.32991000  | 0.29455900  |
| B   | -0.03385300 | 0.09840300  | -0.87147700 | B   | -0.19382600 | -0.17879000 | 0.94006000  |
| B   | -1.32993200 | -0.03640000 | 0.50600800  | B   | -1.26750300 | 0.33568300  | -0.57381000 |
| Si  | 2.41815800  | 1.10489200  | 1.14251100  | Si  | 3.27610200  | -0.65302700 | 0.36500300  |
| Si  | -1.48739300 | -1.01254500 | -2.27829300 | Si  | -1.63438500 | 1.00645500  | 1.83936100  |
| Si  | 1.55188600  | -0.91054000 | 2.05793500  | Si  | 1.81587100  | -0.71643300 | -1.78320700 |
| Si  | 1.88160400  | 0.27348800  | -2.11169400 | Si  | 1.77533300  | -0.80245200 | 2.22365400  |
| Si  | 0.68749900  | 2.69097500  | 0.76348200  | Si  | 0.41291000  | -2.72011900 | -1.19252000 |
| Si  | -1.60058100 | 1.28047400  | -1.74555300 | Si  | -1.88613300 | -1.36286100 | 1.91811600  |
| Si  | -1.32847400 | -2.11905900 | 1.06683500  | Si  | -0.85492100 | 2.30689700  | -1.30338200 |
| Si  | 0.68512800  | -1.78377600 | -1.75312800 | Si  | 0.66868200  | 1.42120100  | 2.21790100  |
| Si  | -1.28322100 | 1.71989600  | 1.82712100  | Si  | -1.54877200 | -1.42281900 | -1.85586100 |
| Si  | 0.96751500  | -2.74856400 | 0.44315500  | Si  | 1.11386100  | 2.56638000  | 0.16070100  |
| Si  | 0.50366800  | 2.15980800  | -1.57845200 | Si  | 0.14778900  | -2.26758100 | 1.14519300  |
| Si  | -0.71278900 | -0.44710400 | 2.63279600  | Si  | -0.23143300 | 0.44212400  | -2.57494800 |
| B   | 0.32498600  | 0.51488900  | 0.82814800  | B   | 0.14332800  | -0.69591500 | -0.60376500 |
| Si  | -2.99878700 | 1.21957400  | 0.19408100  | Si  | -3.08247100 | -0.76524200 | -0.18648900 |
| Si  | -2.93798100 | -1.18658500 | -0.32038100 | Si  | -2.84200700 | 1.67591800  | -0.12757600 |
| 15C |             |             |             | 15D |             |             |             |
|     | X           | Y           | Z           |     | X           | Y           | Z           |
| B   | -0.68121200 | 0.96701400  | 0.71127200  | B   | -1.37600300 | 0.51194100  | -0.17048900 |
| B   | 0.84344700  | 0.54488700  | -0.23431100 | B   | 0.77535300  | -1.39189600 | 0.29808200  |
| B   | 1.03682100  | -1.21365600 | 0.04537900  | B   | 0.10322000  | -0.21399500 | -0.81496700 |
| Si  | -3.71589300 | -0.67790400 | -0.18843700 | Si  | 0.72195300  | 1.75831100  | -0.92122500 |
| Si  | 2.92473800  | -0.49869100 | 0.37564400  | Si  | -1.59216000 | 0.13578500  | 1.96658000  |
| Si  | -1.83852900 | -0.62245700 | 1.35094100  | Si  | -1.00187100 | -2.76521900 | 0.27197100  |
| Si  | -0.91802500 | 2.88860100  | -0.21324600 | Si  | 1.65227300  | 0.17609900  | -2.34039100 |
| Si  | -1.83373600 | -0.86945500 | -1.85167600 | Si  | -3.09479200 | 0.87123800  | -1.46524600 |
| Si  | 2.15569700  | -1.53544300 | -1.77932400 | Si  | -0.08589200 | -1.73132600 | 2.24957700  |
| Si  | 1.46706900  | -1.13874200 | 2.22748300  | Si  | -1.61206600 | -0.99317600 | -1.68838700 |
| Si  | 0.93587400  | 1.84838800  | 1.55915900  | Si  | 2.10483000  | -0.70432800 | 1.81176900  |
| Si  | -0.02267800 | -2.50226500 | -1.24167900 | Si  | 2.85301100  | -1.20655200 | -0.43438300 |
| Si  | -0.29012100 | 0.41487300  | 2.98514000  | Si  | 0.63516700  | -2.19407600 | -1.60484700 |
| Si  | -0.59090100 | 1.14874100  | -1.87515600 | Si  | -0.74877800 | 2.34790100  | 1.63743400  |
| Si  | -0.22383400 | -2.45724400 | 1.21056700  | Si  | -1.47288300 | 2.63009400  | -0.66056700 |
| B   | -0.50515900 | -0.55296200 | -0.24168100 | B   | 0.21004700  | 0.16195500  | 0.87041400  |
| Si  | 1.68948900  | 0.85575900  | -2.20128300 | Si  | 1.62878000  | 1.63719300  | 1.39644500  |
| Si  | -2.61863400 | 1.38040700  | -0.24981900 | Si  | 3.12639100  | 1.28146900  | -0.61274400 |

**Table S2.** Cartesian coordinates for stable isomers of B<sub>4</sub>Si<sub>4-15</sub> clusters.

| B <sub>4</sub> Si <sub>4</sub> |             |             |             |    |             |             |             |
|--------------------------------|-------------|-------------|-------------|----|-------------|-------------|-------------|
| 4A                             |             |             |             | 4B |             |             |             |
|                                | X           | Y           | Z           |    | X           | Y           | Z           |
| Si                             | -1.97096900 | -0.40594200 | -0.24971100 | B  | -0.10090800 | -0.20032100 | -0.66072500 |
| Si                             | 0.00041100  | -1.68080700 | 0.05675600  | B  | -1.08317500 | -0.25252200 | 1.13689300  |
| Si                             | -0.00007800 | 0.68370400  | 1.29509800  | B  | 0.47130200  | 0.22799400  | 1.01722000  |
| Si                             | 1.97106800  | -0.40530800 | -0.24978400 | Si | 1.78518900  | -1.17612500 | 0.08957600  |
| B                              | -0.00024200 | 0.25045900  | -0.84088700 | Si | 1.44494000  | 1.16769600  | -0.54274400 |
| B                              | -0.00035600 | 2.09485900  | -0.63628500 | Si | -1.04603500 | 1.54117900  | 0.28873600  |
| B                              | 1.33531800  | 1.35916000  | -0.45472500 | B  | -0.03908200 | -1.34452600 | 0.69299800  |
| B                              | -1.33593000 | 1.35891000  | -0.45470900 | Si | -1.91557100 | -0.97225900 | -0.61642000 |
| 4C                             |             |             |             | 4D |             |             |             |
|                                | X           | Y           | Z           |    | X           | Y           | Z           |
| Si                             | -1.40179900 | 1.31227300  | -0.54213400 | B  | 0.38553800  | -0.29357800 | -0.91132600 |
| Si                             | 2.56075600  | 0.52450700  | 0.26503400  | B  | 0.39316300  | -0.25881700 | 0.92072800  |
| Si                             | -2.39879900 | -0.66692900 | 0.42037800  | B  | -0.51480100 | -1.46704000 | 0.03228700  |
| Si                             | 1.18542500  | -1.20575000 | -0.62865200 | Si | 2.30829000  | -0.13333100 | -0.00152000 |
| B                              | -0.57176000 | -0.10989400 | 1.06264800  | Si | -1.54062800 | -0.10371700 | -1.23436700 |
| B                              | 0.42241200  | 0.67364000  | -0.33949600 | Si | -1.53098200 | -0.04657800 | 1.23986000  |
| B                              | -0.65145200 | -0.62737000 | -0.63989900 | Si | 0.30111200  | 1.57929600  | -0.02959600 |
| B                              | 0.95316600  | 0.16414200  | 1.27579400  | B  | 1.03028300  | -1.60844300 | 0.03005400  |
| B <sub>4</sub> Si <sub>5</sub> |             |             |             |    |             |             |             |
| 5A                             |             |             |             | 5B |             |             |             |
|                                | X           | Y           | Z           |    | X           | Y           | Z           |
| B                              | -0.82936900 | -0.02347400 | 1.02888400  | B  | 0.01245900  | -1.45680100 | -0.60912800 |
| B                              | 0.82981100  | -0.02202500 | 1.02756200  | B  | -0.76097000 | -0.00130900 | -0.97015700 |
| B                              | -0.00152400 | 1.38584400  | 0.75453200  | B  | 0.88078500  | -0.00113200 | -0.90134700 |
| Si                             | 0.00145300  | -1.84810000 | 0.47739800  | Si | -1.92188500 | 1.32936600  | -0.00507600 |
| Si                             | -1.75314300 | 1.50485900  | -0.11038200 | Si | 1.87955700  | -1.53317200 | -0.00958300 |
| Si                             | 1.74944200  | 1.50833000  | -0.11152800 | Si | 1.87717200  | 1.53367300  | -0.00892400 |
| Si                             | -1.95283600 | -0.84415400 | -0.52546300 | Si | 0.03700500  | 0.00150400  | 1.13347800  |
| B                              | -0.00049200 | 0.11764700  | -0.58792300 | B  | 0.01225900  | 1.45460400  | -0.61493900 |
| Si                             | 1.95564700  | -0.84164600 | -0.52397200 | Si | -1.92346800 | -1.32971500 | -0.00433300 |
| 5C                             |             |             |             | 5D |             |             |             |
|                                | X           | Y           | Z           |    | X           | Y           | Z           |
| B                              | -0.69308800 | 0.11786400  | -0.95491600 | B  | 0.47807500  | 0.07262000  | -0.81657700 |
| B                              | 0.96266300  | 0.08589800  | -0.94100900 | B  | 1.07143200  | 0.58581700  | 0.87181600  |
| B                              | 0.04438200  | -1.40658600 | -0.89621800 | B  | -0.47979800 | 0.07629400  | 0.81987200  |
| Si                             | -1.99398000 | 0.99315600  | 0.25141100  | Si | -2.56912800 | 0.21152000  | 0.31327600  |
| Si                             | 0.17686000  | -0.35890400 | 1.08282500  | Si | -1.04886400 | -1.47467600 | -0.58936700 |
| Si                             | -1.77782600 | -1.48968500 | -0.07494100 | Si | 2.56574100  | 0.20363100  | -0.31423900 |
| Si                             | 0.23192700  | 1.87828800  | -0.31839500 | Si | 1.03972800  | -1.48672100 | 0.58589300  |
| B                              | 1.57639400  | -1.45197400 | -0.50498800 | Si | 0.01234100  | 2.06964200  | 0.00060100  |
| Si                             | 2.68789400  | -0.07471300 | 0.23664600  | B  | -1.06920300 | 0.59976400  | -0.86437100 |

B<sub>4</sub>Si<sub>6</sub>

| 6A |             |             |             | 6B |             |             |             |
|----|-------------|-------------|-------------|----|-------------|-------------|-------------|
|    | X           | Y           | Z           |    | X           | Y           | Z           |
| B  | 0.67057000  | 0.44993900  | -0.79919400 | B  | -0.83004100 | 0.29009100  | -0.92051400 |
| B  | -0.69819600 | -0.45191500 | -0.82220900 | B  | 0.83316500  | 0.23084200  | -0.68515100 |
| B  | -0.67148000 | 0.44779800  | 0.79662500  | B  | -0.10843600 | 1.56688200  | -0.03003600 |
| Si | 1.00930000  | -1.73380400 | -0.83994500 | Si | -2.37851200 | -0.88638600 | -0.25091100 |
| Si | 1.03030100  | 1.74093500  | 0.82398100  | Si | -0.66544700 | -0.15357500 | 1.26775600  |
| Si | -2.53160200 | -0.00935200 | 0.00314900  | Si | -2.07973700 | 1.63981400  | -0.03455500 |
| Si | 2.53160000  | -0.00703600 | -0.00698700 | Si | -0.09433100 | -1.64798700 | -0.79262500 |
| B  | 0.69888400  | -0.44975100 | 0.82034900  | B  | 1.50527200  | 1.62212100  | 0.01104400  |
| Si | -1.00838100 | -1.73228500 | 0.84253500  | Si | 2.97711700  | 0.59242600  | -0.53055200 |
| Si | -1.03114100 | 1.74294500  | -0.82115000 | Si | 1.74092600  | -0.86926900 | 0.92112100  |
| 6C |             |             |             | 6D |             |             |             |
|    | X           | Y           | Z           |    | X           | Y           | Z           |
| Si | -1.22388400 | 2.06084500  | -0.44782800 | B  | -0.42453100 | -0.11721200 | -0.66806000 |
| Si | 1.03425500  | 1.46476200  | -0.41758500 | B  | 0.83954800  | 0.34433600  | 0.57636700  |
| Si | 1.03654500  | -1.45959900 | -0.42015400 | B  | 0.15392300  | -1.30638300 | 0.53067700  |
| Si | 2.81498400  | 0.00040700  | 0.28616000  | Si | -2.32014900 | 0.62641600  | -0.62682600 |
| B  | -0.46041000 | 0.83657400  | 1.04910900  | Si | -1.08322500 | 0.19560000  | 1.49982300  |
| B  | -0.45855100 | -0.83646600 | 1.04979500  | Si | -1.72540600 | -1.69411000 | -0.13276700 |
| B  | 0.98593100  | 0.00182300  | 1.10540600  | Si | -0.22823100 | 1.93470500  | -0.17262000 |
| B  | -0.50593900 | 0.00003600  | -0.60396100 | B  | 1.73110100  | -1.13955200 | 0.72329700  |
| Si | -1.21713000 | -2.06424000 | -0.44672000 | Si | 3.04303400  | 0.15631400  | 0.39865200  |
| Si | -2.28799500 | -0.00287700 | 0.51743100  | Si | 1.49253200  | -0.42649200 | -1.38136300 |

B<sub>4</sub>Si<sub>7</sub>

| 7A |             |             |             | 7B |             |             |             |
|----|-------------|-------------|-------------|----|-------------|-------------|-------------|
|    | X           | Y           | Z           |    | X           | Y           | Z           |
| B  | -0.74952100 | 0.59282400  | 0.61594800  | B  | -0.63945300 | 0.39301600  | 0.65912400  |
| B  | 0.70086700  | 0.36890300  | -0.35376300 | B  | -0.66449200 | -0.88640500 | -0.62833700 |
| B  | 0.15953000  | -0.88464200 | 0.92092900  | B  | 0.66141800  | -0.88895600 | 0.62356500  |
| Si | -2.64595900 | 0.70920300  | -0.03639200 | Si | 2.55396000  | -0.34933700 | -0.17018900 |
| Si | -0.99582000 | -0.92910600 | -1.07901600 | Si | 1.30084200  | 0.99772200  | 1.46160100  |
| Si | -1.80250100 | -1.18664100 | 1.25653000  | Si | -2.55509000 | -0.34667600 | 0.16942700  |
| Si | -0.74695200 | 1.51511200  | -1.32325100 | Si | -1.07151700 | -1.65626800 | 1.36627600  |
| B  | 1.75489400  | -0.75545100 | 0.88290800  | Si | -1.30173800 | 1.00419700  | -1.45771900 |
| Si | 2.73739800  | 0.63710000  | -0.25955100 | B  | 0.64065000  | 0.39487700  | -0.65753000 |
| Si | 1.59305500  | -1.52626500 | -0.94543100 | Si | 0.00504200  | 2.36025600  | -0.00011900 |
| Si | 1.19443300  | 1.02287100  | 1.64924500  | Si | 1.06917100  | -1.65722600 | -1.36814100 |
| 7C |             |             |             | 7D |             |             |             |
|    | X           | Y           | Z           |    | X           | Y           | Z           |
| B  | 0.66261800  | -0.57414600 | 0.79954100  | B  | -0.02585300 | 1.41587900  | -0.21472800 |
| B  | 0.10163900  | 0.98020800  | 0.88464300  | B  | 0.49313300  | -0.19095900 | -0.70585700 |
| B  | -0.51366800 | 0.11958100  | -0.64055500 | B  | -0.69007300 | -0.01763100 | 0.70257900  |
| Si | 2.14018600  | 0.94950200  | 0.78592300  | Si | 0.51965800  | -1.70956300 | 0.94806800  |
| Si | -0.20868300 | -1.94214600 | -0.48412400 | Si | 2.50455600  | -0.70837600 | -0.27051200 |
| Si | -1.66994100 | 1.65038200  | 0.17318900  | Si | 1.25986100  | 0.71005800  | 1.42295800  |
| Si | 2.28941000  | -1.45405000 | -0.20322300 | Si | 1.83537100  | 1.42417200  | -0.99624500 |
| B  | 1.16218200  | 0.00145800  | -0.96842600 | Si | -1.93447100 | 1.84237000  | 0.16891800  |
| Si | 0.63236000  | 1.94080500  | -1.06552000 | Si | -2.66638900 | -0.44163000 | 0.26283700  |
| Si | -1.34900800 | -0.58112700 | 1.51738800  | B  | -1.14273200 | 0.32873900  | -1.01282900 |
| Si | -2.33888500 | -0.75161500 | -0.75049100 | Si | -1.03089800 | -1.66561300 | -1.09644000 |

B<sub>4</sub>Si<sub>8</sub>

| 8A |             |             |             | 8B |             |             |             |
|----|-------------|-------------|-------------|----|-------------|-------------|-------------|
|    | X           | Y           | Z           |    | X           | Y           | Z           |
| B  | -0.89290000 | -0.02039300 | -1.26808800 | B  | -0.03161000 | -1.07519200 | 0.24244000  |
| B  | -0.07972400 | 1.38107900  | -0.80276500 | B  | -0.99832200 | 0.59888100  | 0.82041700  |
| B  | 0.75824800  | 0.08298900  | 0.18090900  | B  | -0.73198300 | 0.29853900  | -1.22756400 |
| Si | -2.05325500 | 1.41732200  | -0.02278500 | Si | 0.96577100  | 0.31387100  | 1.56720900  |
| Si | -0.31966600 | -1.88726700 | -0.14993300 | Si | -0.02982900 | -1.54792900 | -1.83780500 |
| Si | 1.78978600  | 1.84648300  | -0.54468200 | Si | -2.17158900 | 1.56340000  | -0.65521300 |
| Si | -2.51853000 | -0.95489900 | -0.63350000 | Si | 1.89648700  | -1.50810600 | -0.30289400 |
| B  | -1.03997800 | -0.20109300 | 0.77700900  | B  | 0.89286700  | 0.12387000  | -0.97785500 |
| Si | 0.00156100  | 1.53152000  | 1.53885600  | Si | 0.15131000  | 2.00783500  | -0.28279300 |
| Si | 1.05452100  | -0.06663100 | -1.93692000 | Si | -2.06223400 | -1.03385300 | -0.10111700 |
| Si | 2.04116200  | -1.47609300 | 0.10454200  | Si | -0.89462000 | -0.94334700 | 2.16655000  |
| Si | 0.45240400  | -0.85421500 | 2.04190000  | Si | 2.45507800  | 1.16738000  | -0.14587900 |
| 8C |             |             |             | 8D |             |             |             |
|    | X           | Y           | Z           |    | X           | Y           | Z           |
| B  | -0.45412300 | 0.02187600  | 0.06333800  | B  | 0.27608500  | -1.13811900 | -0.36852000 |
| B  | 0.17717800  | 1.61895800  | -0.13118100 | B  | -0.77338300 | 0.24514600  | -0.78762900 |
| B  | 0.90485600  | 0.23726000  | -1.09732900 | B  | 0.37001500  | 0.54527100  | 0.63044100  |
| Si | 2.37929000  | -0.80858600 | 0.05489600  | Si | -1.37577700 | 1.59935600  | 0.90233100  |
| Si | 0.18150700  | -1.78172400 | -1.04223500 | Si | -2.82239600 | 0.11010800  | -0.47984500 |
| Si | -1.84631300 | 1.69348500  | -0.03848700 | Si | -1.06893000 | -0.87007200 | 1.41314100  |
| Si | -0.97780100 | 0.21590000  | -1.98721800 | Si | -1.51848800 | -1.80672300 | -0.96104300 |
| Si | -0.65700200 | 0.77608800  | 2.04757900  | Si | 2.33514400  | -1.17336000 | -1.00515600 |
| B  | 1.03842600  | 0.50149900  | 0.95174800  | Si | 2.34241700  | 1.08065800  | 0.25883300  |
| Si | 0.17651700  | -1.46175300 | 1.52988800  | B  | 0.92889900  | 0.26883100  | -1.15134500 |
| Si | 2.19140700  | 1.66432400  | -0.43868100 | Si | 0.31457900  | 2.15934900  | -0.91166300 |
| Si | -2.04272600 | -1.14758900 | -0.04951900 | Si | 1.50716000  | -1.07114900 | 1.38235000  |

B<sub>4</sub>Si<sub>9</sub>

| 9A |             |             |             | 9B |             |             |             |
|----|-------------|-------------|-------------|----|-------------|-------------|-------------|
|    | X           | Y           | Z           |    | X           | Y           | Z           |
| B  | 0.65144900  | 0.21651100  | 0.87479300  | B  | -0.45705600 | -0.93444900 | 0.30072100  |
| B  | -1.55663200 | 0.55113200  | -0.00034000 | B  | 1.08177700  | 0.28954500  | -1.42494100 |
| B  | -0.37637600 | -0.96314900 | 0.00003000  | B  | -0.49801600 | 0.79008000  | 0.55871400  |
| Si | -0.58200200 | 1.92462700  | -1.37398200 | Si | -2.22405400 | 1.35974500  | -0.62018000 |
| Si | 2.58924100  | -0.25883300 | 0.00298800  | Si | -2.18664900 | -0.25681900 | 1.42195100  |
| Si | -2.54153000 | -1.13212300 | 0.00083300  | Si | 1.56640600  | -1.51020200 | 0.65446000  |
| Si | 1.46692800  | 1.99266300  | 0.00076500  | Si | 0.17405100  | -0.32599400 | 2.26615500  |
| B  | 0.65147000  | 0.21699700  | -0.87423800 | Si | 0.35099200  | -1.71397600 | -1.49844700 |
| Si | -1.07902700 | -0.41327000 | -1.95667200 | B  | -0.54629600 | 0.15513900  | -1.07348400 |
| Si | -1.07929000 | -0.41067300 | 1.95696000  | Si | -2.15369500 | -1.21917800 | -1.00311600 |
| Si | 1.01576500  | -1.81991200 | 1.32411400  | Si | 0.20784400  | 2.14334500  | -0.90100500 |
| Si | 1.01860700  | -1.81647600 | -1.32603600 | Si | 1.51613300  | 1.28919300  | 1.02479200  |
| Si | -0.58366000 | 1.92632200  | 1.37094200  | Si | 2.89882600  | 0.12663100  | -0.75925600 |
| 9C |             |             |             | 9D |             |             |             |
|    | X           | Y           | Z           |    | X           | Y           | Z           |
| B  | -0.64821300 | 0.68424700  | 0.59620300  | B  | 0.31662900  | -1.01713500 | -1.10593700 |
| B  | -0.81868400 | 0.05962300  | -1.11410800 | B  | -0.97470500 | -0.45510400 | 0.11944100  |
| B  | 0.02874900  | -1.01019100 | 0.20018000  | B  | -0.24766700 | 0.53948600  | -1.12413800 |
| Si | 2.05947600  | -1.51144700 | 0.46457700  | Si | 0.66590500  | 2.36626600  | -0.72803200 |
| Si | 0.65969800  | -0.13488500 | 2.02847000  | Si | 1.86747700  | 0.37142600  | -1.42695700 |
| Si | -2.66375300 | 0.47928300  | -0.16377100 | Si | -0.38325000 | -2.46191000 | 0.15779700  |
| Si | -1.52788400 | -1.03550800 | 1.55857400  | Si | -1.54539100 | -1.09922200 | -1.86198800 |
| Si | -1.02295400 | 2.22008800  | -0.88343200 | Si | -1.92456300 | 0.62707500  | 1.81739400  |
| B  | 0.57202500  | 0.88994600  | -0.89369300 | B  | -0.31126300 | 1.06877300  | 0.66553600  |
| Si | 0.81618700  | 2.11495700  | 0.78064400  | Si | 0.15708700  | -0.56983700 | 1.93182300  |
| Si | 0.89024700  | -1.06640300 | -1.73705200 | Si | 1.95574700  | -1.46150700 | 0.17318600  |
| Si | 2.61735100  | 0.58920700  | -0.67821200 | Si | 1.81376700  | 1.02852200  | 1.08206900  |
| Si | -1.51903900 | -1.87801600 | -0.93714900 | Si | -2.17213200 | 1.15060800  | -0.62918500 |



B<sub>4</sub>Si<sub>10</sub>

| 10A |             |             |             | 10B |             |             |             |
|-----|-------------|-------------|-------------|-----|-------------|-------------|-------------|
|     | X           | Y           | Z           |     | X           | Y           | Z           |
| B   | -0.04995100 | 0.90295200  | 0.64558000  | B   | -0.51111300 | -1.04282000 | 0.28924200  |
| B   | -0.04945700 | -0.90325700 | 0.64345900  | B   | -0.50954200 | 0.27477300  | -1.05291800 |
| B   | 1.50039300  | -0.00008400 | -0.70490200 | B   | 0.90110500  | 0.00342400  | 0.00046200  |
| Si  | -1.73843900 | -1.96824300 | 0.03201300  | Si  | -2.23161300 | 1.45541400  | -0.40373300 |
| Si  | -3.28105400 | 0.00143300  | -0.13673700 | Si  | -0.02674300 | -0.60431300 | 2.32933700  |
| Si  | -1.73626000 | 1.96911300  | 0.03113900  | Si  | 1.38073700  | 0.52162400  | -2.01315800 |
| Si  | -1.71408400 | -0.00045800 | 1.71504300  | Si  | -2.22552100 | -0.38373400 | 1.46930800  |
| Si  | 1.59864300  | -0.00052500 | 1.70885000  | B   | -0.50932000 | 0.77562100  | 0.76274200  |
| Si  | 1.69471600  | -1.94779800 | 0.04521200  | Si  | -0.03751800 | 2.32405800  | -0.64271400 |
| Si  | 3.35302800  | 0.00117200  | 0.00636700  | Si  | -0.02022900 | -1.71444800 | -1.68387000 |
| Si  | 1.69308000  | 1.94809300  | 0.04534100  | Si  | 1.37443900  | -2.00451300 | 0.55562900  |
| Si  | 0.03872400  | 1.23472400  | -1.73758900 | Si  | 1.37715800  | 1.49159100  | 1.45325300  |
| Si  | 0.03788100  | -1.23737800 | -1.73601800 | Si  | -2.22243400 | -1.08744400 | -1.06843100 |
| B   | -1.25044400 | 0.00001600  | -0.51027600 | Si  | 2.85632000  | -0.00216400 | 0.00454800  |
| 10C |             |             |             | 10D |             |             |             |
|     | X           | Y           | Z           |     | X           | Y           | Z           |
| B   | -0.54898100 | 0.70972500  | 0.73165000  | B   | 0.65766400  | -0.84596500 | 0.30116300  |
| B   | -0.55530000 | 0.50894700  | -0.98674000 | B   | 0.52426100  | 0.19600100  | -1.10997800 |
| B   | -0.79655700 | -0.89984500 | 0.06555400  | B   | 0.33596700  | 0.87144600  | 0.56219400  |
| Si  | 0.44564900  | -2.59333500 | 0.29376200  | Si  | -1.78804500 | 1.26430000  | 0.97995200  |
| Si  | -0.07463200 | -0.84182000 | 2.04675700  | Si  | -0.25959600 | -0.36704200 | 2.15638900  |
| Si  | -2.17682000 | 1.76077100  | -0.28335200 | Si  | 2.54700800  | -0.67248800 | -0.78308000 |
| Si  | -2.44582000 | -0.24251800 | 1.25337700  | Si  | 2.09742800  | 0.25902000  | 1.57520500  |
| Si  | 0.23038900  | 2.39367500  | -0.37434800 | Si  | 0.77755000  | -2.28394000 | -1.25670800 |
| B   | 1.11230200  | 0.57404700  | -1.17221800 | B   | -0.70312400 | -0.94965200 | -1.04192000 |
| Si  | 1.40998600  | 1.12687400  | 1.48550200  | Si  | -0.80210300 | -2.34869800 | 0.56966400  |
| Si  | 0.10040400  | -1.28461000 | -1.84490200 | Si  | -1.62802700 | 0.79135100  | -1.56489300 |
| Si  | 2.17853300  | -1.06147900 | -0.17402000 | Si  | -2.68423600 | -0.78851100 | -0.20196900 |
| Si  | -2.35284100 | -0.58898300 | -1.34301400 | Si  | 1.88639600  | 1.78361500  | -0.55460700 |
| Si  | 2.96677100  | 1.01254200  | -0.57342000 | Si  | -0.43736300 | 2.62245500  | -0.45975900 |

B<sub>4</sub>Si<sub>11</sub>

| 11A |             |             | 11B         |    |             |             |             |
|-----|-------------|-------------|-------------|----|-------------|-------------|-------------|
|     | X           | Y           | Z           |    | X           | Y           | Z           |
| B   | -0.85844100 | -0.46493200 | -0.07927200 | B  | 0.71676700  | -0.11941900 | -0.87214700 |
| B   | 0.85851500  | -0.46486500 | -0.07937900 | B  | -1.75792800 | -0.85986400 | 0.40511100  |
| B   | -0.00007900 | 1.02035500  | 0.07179900  | B  | 1.04852000  | 0.85388100  | 0.55674500  |
| Si  | 1.73367700  | 1.19028200  | 1.36015400  | Si | 2.93759000  | -0.00314100 | 1.04740900  |
| Si  | 0.00011000  | -2.16475500 | 1.03671500  | Si | 2.45223400  | 1.10945700  | -1.10521400 |
| Si  | 2.22694800  | -1.21904600 | 1.25647300  | Si | -1.21591100 | -0.11901700 | -1.80221600 |
| Si  | -1.73365600 | 1.18951200  | 1.36042700  | Si | 0.10776500  | 1.91051800  | -1.17680000 |
| Si  | -2.30547000 | -1.06233200 | -1.36565900 | Si | -0.08775400 | -2.08349400 | -0.80325100 |
| Si  | 1.87256700  | 1.33250400  | -0.97034000 | B  | 0.99223700  | -0.87196600 | 0.73084300  |
| Si  | 2.30608200  | -1.06205300 | -1.36521900 | Si | 2.32280100  | -1.53343300 | -0.80506500 |
| Si  | -0.00047200 | 2.92870800  | -0.70824000 | Si | -0.53737500 | 0.10593200  | 1.83789900  |
| Si  | 0.00041400  | -2.05726100 | -1.33328000 | Si | -0.26071300 | 2.42734600  | 1.33753400  |
| Si  | -1.87316900 | 1.33216000  | -0.97001300 | Si | -3.42548400 | -0.45630500 | -0.62421200 |
| Si  | -2.22696500 | -1.21968200 | 1.25623000  | Si | -2.03072500 | 1.20228600  | 0.21814200  |
| B   | -0.00018200 | 2.18293600  | 1.32656200  | Si | -0.61942700 | -2.20394500 | 1.58271900  |
| 11C |             |             | 11D         |    |             |             |             |
|     | X           | Y           | Z           |    | X           | Y           | Z           |
| B   | 0.88647200  | -0.85170100 | 0.32406300  | B  | -0.46561100 | -0.62466600 | 0.85635800  |
| B   | 0.48992500  | 0.88905200  | 0.37637100  | B  | 0.83516300  | 0.55549500  | 0.24619700  |
| B   | -0.99273200 | 1.09619900  | -0.75810100 | B  | -0.83449400 | 0.82475500  | -0.05027800 |
| Si  | -1.57056900 | -0.50545300 | -2.04318000 | Si | 1.64756100  | -1.41209600 | -1.70537100 |
| Si  | -1.68871900 | -1.22262900 | 0.43214000  | Si | -2.31861800 | -1.97442800 | 0.41758100  |
| Si  | 2.57224900  | 0.25347600  | 0.99270900  | Si | 0.36492200  | 2.54688000  | -0.00388500 |
| Si  | 0.47990000  | -0.14048500 | 2.28648400  | Si | 0.14146300  | -2.44932800 | 0.01037800  |
| Si  | 2.23467300  | -0.79053700 | -1.38586500 | B  | -0.12232700 | -0.51208200 | -0.95878300 |
| B   | 0.33437500  | 0.06806600  | -1.17121500 | Si | 1.26819900  | 0.95981900  | -1.82550600 |
| Si  | 0.21851800  | -2.19329000 | -1.16965400 | Si | 2.04079300  | 1.24998700  | 1.74166600  |
| Si  | -0.18149200 | 2.86405400  | -0.31984000 | Si | -2.42115600 | 0.18773300  | 1.26910300  |
| Si  | -1.29017100 | 1.54677100  | 1.40972500  | Si | -2.28179100 | -0.14311500 | -1.29839300 |
| Si  | -2.98540900 | 0.52515600  | -0.16894400 | Si | 1.32826800  | -1.07502100 | 1.73927700  |
| Si  | 1.95207600  | 1.73499000  | -0.93324800 | Si | -2.49111700 | 2.03261100  | -0.26910800 |
| Si  | 0.00250200  | -2.50120200 | 1.33856100  | Si | 2.93121500  | -0.01000700 | -0.10913100 |

B<sub>4</sub>Si<sub>12</sub>

| 12A |             |             |             | 12B |             |             |             |
|-----|-------------|-------------|-------------|-----|-------------|-------------|-------------|
|     | X           | Y           | Z           |     | X           | Y           | Z           |
| B   | 0.91296700  | -0.79009600 | 0.49679200  | Si  | -2.29443000 | 0.82553300  | -0.93740000 |
| B   | -1.56606300 | 0.47180700  | -0.35257200 | Si  | -3.03971600 | -0.29959300 | 1.03524500  |
| B   | 0.14172700  | 0.84572300  | 0.24827900  | Si  | -1.24268900 | 1.26045400  | 1.57276900  |
| Si  | 1.68587000  | 0.18586700  | -1.43252000 | Si  | -1.94754000 | -2.35022000 | 0.05002500  |
| Si  | -0.66724200 | -2.08154400 | 0.90965800  | Si  | -0.87924500 | 2.64944800  | -0.40554300 |
| Si  | -2.67436300 | -0.66021400 | 1.15630500  | Si  | 0.35313700  | -2.11267100 | 0.64183600  |
| Si  | 1.48665600  | 2.35479800  | -0.59115200 | Si  | 1.93886300  | 1.43979900  | 1.61380600  |
| Si  | 2.29093600  | 0.81173700  | 1.18135500  | Si  | -0.92173100 | -0.94002400 | -1.76872400 |
| Si  | -2.29596800 | -1.32456700 | -1.12045500 | Si  | 1.57369400  | 2.09954300  | -0.96500100 |
| Si  | 0.32405800  | 0.03979200  | 2.32917700  | Si  | 1.38307400  | -0.04566500 | -2.15435400 |
| Si  | -1.30899900 | 0.39342600  | -2.40396200 | Si  | 2.33328800  | -1.75974200 | -0.69636100 |
| Si  | -1.02313100 | 2.50949500  | -0.61135100 | Si  | 2.35217600  | -0.87884100 | 1.63262000  |
| Si  | -1.56725800 | 1.48446900  | 1.53664500  | B   | 0.39188600  | 0.00777100  | 1.18767200  |
| Si  | 0.99242600  | -2.49132800 | -0.75126200 | B   | 1.70427600  | 0.20328500  | -0.04340100 |
| Si  | 3.00353700  | -1.18601900 | -0.02888400 | B   | 0.00164100  | 0.65343800  | -0.49945900 |
| B   | -0.17889300 | -0.62798200 | -0.87844800 | B   | -1.00267500 | -0.55095500 | 0.42221500  |
| 12C |             |             |             | 12D |             |             |             |
|     | X           | Y           | Z           |     | X           | Y           | Z           |
| B   | -0.03478500 | 0.41459100  | 1.21321500  | B   | 1.00182200  | -0.42416800 | 0.09753300  |
| B   | -1.12784500 | 0.44510900  | -1.26624600 | B   | -0.79546200 | -0.52659200 | 0.08527000  |
| B   | 0.94822300  | -0.69238700 | 0.23873300  | B   | 0.12102500  | 1.00268000  | -0.12732100 |
| Si  | 2.50101800  | 0.55557800  | -1.16499900 | Si  | -1.52458700 | 1.02418100  | -1.51627900 |
| Si  | 2.03899200  | 0.79094100  | 1.43522500  | Si  | 0.30247600  | -2.21751300 | -0.92434100 |
| Si  | -2.64555100 | -0.13053000 | 0.49580700  | Si  | -3.04997000 | -0.46987200 | 0.00769400  |
| Si  | -0.86176100 | -1.64453100 | 1.09015600  | Si  | 1.84035200  | 1.16277900  | -1.43709500 |
| Si  | -0.91211300 | 2.09594200  | 0.20172100  | Si  | 2.52774200  | -0.91218600 | 1.36087900  |
| B   | 0.43402900  | 0.81067000  | -0.48590800 | Si  | -1.60681700 | 1.38966300  | 1.04432500  |
| Si  | 1.75615900  | 2.54904500  | -0.25685700 | Si  | -1.75163200 | -0.72163600 | 2.07698600  |
| Si  | 0.50210500  | -0.73422800 | -1.93949500 | Si  | 0.08636500  | 2.98535500  | 0.51811300  |
| Si  | 0.79690900  | -2.63255600 | -0.36394600 | Si  | 0.27912600  | -1.96585400 | 1.47742600  |
| Si  | -2.81075800 | 1.46876200  | -1.28820400 | Si  | 1.98917800  | 1.40155900  | 0.88743900  |
| Si  | -1.98159700 | -1.52887900 | -1.22033900 | Si  | 2.47023200  | -1.16803800 | -1.15219900 |
| Si  | 3.00800900  | -1.14896600 | 0.48706300  | B   | 0.09220000  | 2.13908200  | -1.41954200 |
| Si  | -1.46984900 | 0.01014300  | 2.63108600  | Si  | -1.71231500 | -1.29093900 | -1.85578400 |

B<sub>4</sub>Si<sub>13</sub>

| 13A |             |             |             | 13B |             |             |             |
|-----|-------------|-------------|-------------|-----|-------------|-------------|-------------|
|     | X           | Y           | Z           |     | X           | Y           | Z           |
| B   | 0.66568200  | -0.00064200 | -1.13207000 | Si  | -1.43977000 | 0.30007600  | -1.79436500 |
| B   | -1.54869900 | 0.00011700  | 0.72091000  | Si  | -3.12710900 | -0.12122700 | -0.16029400 |
| B   | -0.02246300 | -0.93318200 | 0.22223000  | Si  | -1.86105400 | 1.76209500  | 0.50612000  |
| Si  | 2.09900200  | 0.00115200  | 1.04179400  | Si  | -2.02938100 | -1.45389300 | 1.70133000  |
| Si  | -0.69494400 | 1.42130100  | -1.95884400 | Si  | -0.52368000 | 2.50928800  | -1.35834100 |
| Si  | -2.83433700 | -0.00056500 | -1.07008500 | Si  | -0.50478100 | 0.61386900  | 2.16828800  |
| Si  | 1.29987100  | -2.14224200 | 1.44255800  | Si  | 1.95156300  | 1.75851800  | -1.04994600 |
| Si  | 1.46187900  | -1.99074900 | -1.09375300 | Si  | -0.49440500 | -2.44491200 | 0.02177400  |
| Si  | -2.03815500 | 1.96193400  | 0.08112800  | Si  | 2.21268100  | -0.77688700 | -1.71253700 |
| Si  | -0.69364800 | -1.42436100 | -1.95817300 | Si  | 1.88446600  | -1.98773900 | 0.44046300  |
| Si  | -0.93131800 | 1.42409300  | 2.14527600  | Si  | 1.84602600  | -0.36861600 | 2.28944400  |
| Si  | -0.93151800 | -1.42272500 | 2.14629800  | Si  | 1.76560600  | 1.82627400  | 1.34073400  |
| Si  | -2.03743400 | -1.96225400 | 0.08192000  | B   | 0.13243500  | 0.95994400  | 0.06209900  |
| Si  | 1.46101000  | 1.98985000  | -1.09651600 | B   | 1.71818600  | 0.09430500  | 0.19401000  |
| Si  | 2.87208100  | -0.00029200 | -1.21267800 | B   | 0.34974700  | -0.69071800 | -0.59854200 |
| B   | -0.02318200 | 0.93392800  | 0.22072200  | B   | -1.06803000 | -0.34509900 | 0.34373700  |
| 13C |             |             |             | 13D |             |             |             |
|     | X           | Y           | Z           |     | X           | Y           | Z           |
| Si  | -0.70789100 | -1.99269200 | -1.92080500 | B   | -1.36798400 | 0.77367900  | -0.01908700 |
| Si  | 2.25808100  | 0.12516500  | -1.18223000 | B   | -0.46897900 | -0.77736700 | -0.39458000 |
| Si  | 1.60927400  | -2.20930000 | -1.10591400 | B   | 1.15662800  | -0.07521300 | -0.07484400 |
| Si  | -1.43495100 | 1.96911400  | -0.95945700 | Si  | -2.47691600 | -0.39202900 | 1.53564700  |
| Si  | 1.83378500  | 1.93270400  | 0.74469100  | Si  | 0.92900000  | 0.96636100  | -1.95456800 |
| Si  | -1.98355300 | -1.62444300 | 0.16305600  | Si  | -1.16355200 | 1.68560600  | 1.91847300  |
| Si  | -3.19933500 | 0.21434600  | -1.00442500 | Si  | -2.51650600 | -0.60568700 | -1.09349800 |
| Si  | 1.28100000  | -1.95849700 | 1.35410000  | Si  | -0.74503800 | -2.18884500 | 1.32934100  |
| Si  | -2.62873100 | 0.59338500  | 1.34834400  | Si  | 1.09998400  | -1.38720900 | -1.76457500 |
| Si  | 2.92475500  | -0.10990900 | 1.16464200  | Si  | 2.61453300  | 1.39380500  | -0.34033100 |
| Si  | -0.51662900 | 1.73885400  | 1.31300900  | Si  | -1.48484300 | 1.49068700  | -2.01704100 |
| Si  | 1.41063300  | 2.20672900  | -1.68182200 | Si  | 1.52331400  | -1.16724100 | 1.80615700  |
| B   | 0.74618500  | 0.07644200  | 0.99194000  | Si  | -0.68720200 | 2.73766500  | -0.25071100 |
| B   | 0.13606700  | -0.91018100 | -0.33916900 | Si  | -1.01817900 | -2.58806200 | -1.09537600 |
| B   | 0.21436100  | 0.81658000  | -0.56379700 | Si  | 1.29972800  | 1.20717600  | 1.86140100  |
| B   | -1.14637700 | -0.13589600 | -1.27349400 | B   | -0.25087300 | -0.08035400 | 1.12138600  |

B<sub>4</sub>Si<sub>14</sub>

| 14A |             |             |             | 14B |             |             |             |
|-----|-------------|-------------|-------------|-----|-------------|-------------|-------------|
|     | X           | Y           | Z           |     | X           | Y           | Z           |
| B   | 0.69209200  | 1.34172100  | -0.00111200 | B   | 0.10181000  | -0.43219100 | 0.90064600  |
| B   | 0.06418700  | -0.21502300 | 0.87409000  | B   | -0.07344900 | -0.43554400 | -0.90872200 |
| B   | -1.34109100 | -0.75409100 | 0.00187400  | B   | 0.13851300  | 1.29221600  | -1.56469500 |
| Si  | 1.73075600  | 0.59806200  | -2.00526700 | Si  | 1.24099800  | -2.38413900 | 1.06989500  |
| Si  | -1.96327300 | -0.21198300 | 1.89758600  | Si  | -1.14421700 | 2.21315600  | -0.10622500 |
| Si  | -0.38315200 | 1.66346800  | -1.88944600 | Si  | 2.18618600  | -0.26115000 | 1.78275100  |
| Si  | 1.73196800  | 0.60239800  | 2.00407800  | Si  | -1.81478000 | -1.31278800 | 0.21203000  |
| Si  | 1.12588100  | -1.74071900 | -1.95959200 | Si  | 1.13592100  | -2.20567300 | -1.60018100 |
| Si  | -1.13534400 | -2.48623000 | 1.25034100  | Si  | -1.64622200 | 0.55483400  | -1.97762900 |
| Si  | -2.64882800 | 1.06062400  | -0.00368100 | Si  | 1.03162400  | 2.90909200  | -0.47431000 |
| Si  | -0.38153800 | 1.66689900  | 1.88752000  | Si  | -1.48080700 | 0.60775600  | 1.97916200  |
| Si  | -1.14003800 | -2.49454100 | -1.23316400 | Si  | 1.77401500  | 0.11298700  | -2.13536700 |
| Si  | -0.94249100 | 2.96682800  | -0.00238800 | Si  | 0.60823100  | 1.65376100  | 1.68035700  |
| Si  | 2.17478300  | -1.10818500 | -0.00399500 | Si  | -1.22301700 | -1.88235800 | -1.95978800 |
| Si  | -1.96135200 | -0.22147800 | -1.89808500 | Si  | 2.69462800  | 1.06818200  | -0.16044600 |
| B   | 0.06259200  | -0.21682700 | -0.87390900 | B   | 1.47123900  | -0.66506900 | -0.16392700 |
| Si  | 1.13467400  | -1.73588400 | 1.95767900  | Si  | -3.10608700 | 0.85266200  | 0.05622400  |
| 14C |             |             |             | 14D |             |             |             |
|     | X           | Y           | Z           |     | X           | Y           | Z           |
| B   | 1.74484100  | 0.08819300  | -0.00574800 | Si  | -1.83174500 | 2.01977300  | 0.56383000  |
| B   | -1.10284100 | 1.08165700  | 0.00505400  | Si  | -3.31200600 | 0.08596700  | 0.36541700  |
| B   | 0.09394400  | 0.10989400  | -0.89074300 | Si  | -0.00189400 | -0.70734800 | 2.62680400  |
| Si  | 0.37458500  | -2.03985300 | -0.02053800 | Si  | -2.48294800 | -0.46418200 | -2.02294800 |
| Si  | 1.65618300  | 1.63717500  | 1.37600000  | Si  | -0.00121500 | 1.75205300  | 2.09525600  |
| Si  | -0.23141100 | 3.08643300  | -0.01728600 | Si  | -1.18521800 | -2.19101700 | -0.88664300 |
| Si  | -0.74375700 | -1.51453000 | -2.07846100 | Si  | 1.82872600  | -1.56749700 | 1.36364200  |
| Si  | 1.81136000  | -0.71921200 | -2.00744200 | Si  | -1.19420500 | 1.59819000  | -1.72937800 |
| Si  | -0.77682200 | 1.83409500  | 1.94406400  | Si  | 1.82875400  | 2.01883300  | 0.56592300  |
| Si  | 1.64784200  | 1.63753500  | -1.38480200 | Si  | 1.19509800  | 1.59874500  | -1.72909300 |
| Si  | -2.46830400 | -0.00674400 | 1.26809500  | Si  | 2.48289900  | -0.46576200 | -2.02393000 |
| Si  | -2.52043100 | -0.00404000 | -1.20357500 | Si  | 1.19159200  | -2.19257700 | -0.87740600 |
| Si  | -0.80203600 | 1.79179500  | -1.95038300 | B   | -0.00026500 | -0.81054800 | 0.42677500  |
| Si  | 1.81374000  | -0.71838900 | 2.00054200  | B   | 1.40927500  | -0.05498800 | -0.27720200 |
| Si  | 2.76256700  | -1.77795000 | -0.00570800 | B   | -0.00017000 | 0.92477400  | 0.03677000  |
| B   | 0.09447100  | 0.11210000  | 0.89817900  | B   | -1.41294900 | -0.05371400 | -0.27294000 |
| Si  | -0.70301500 | -1.54328900 | 2.07231700  | Si  | 3.31001400  | 0.08992100  | 0.36257300  |

B<sub>4</sub>Si<sub>15</sub>

| 15A |             |             |             | 15B |             |             |             |
|-----|-------------|-------------|-------------|-----|-------------|-------------|-------------|
|     | X           | Y           | Z           |     | X           | Y           | Z           |
| B   | -0.34128100 | 0.33481400  | 0.98539400  | B   | -1.46468600 | 0.66510100  | -0.11814500 |
| B   | 1.31887500  | 0.31973600  | 0.35717100  | B   | -0.10853500 | -0.26678000 | -0.84565700 |
| B   | 0.08848700  | -0.68789600 | -0.50163700 | B   | 1.32505200  | -0.02830400 | 0.26171500  |
| Si  | -1.22590400 | 2.37157800  | 0.41302700  | Si  | -2.50125400 | -0.86034000 | 1.36859900  |
| Si  | 1.94099400  | -1.63531500 | 1.11482300  | Si  | 1.47254900  | 0.80438400  | -1.85687500 |
| Si  | -2.64612800 | 0.69009600  | 1.15782000  | Si  | -1.44377900 | 1.20237900  | 1.93002500  |
| Si  | 1.01521900  | 2.21375500  | 1.38073700  | Si  | -2.00119700 | -0.39557300 | -2.05932900 |
| Si  | -0.72303100 | 2.13162000  | -1.88902300 | Si  | -0.85181600 | -2.51164000 | 1.04494200  |
| Si  | 1.92719500  | -0.01591300 | -1.60748700 | Si  | 1.45825600  | -1.58250000 | -1.69616900 |
| Si  | -3.09300500 | -0.74140700 | -0.73535900 | Si  | 1.56001600  | 2.11539300  | 0.52176700  |
| Si  | 1.04142700  | 0.03205800  | 2.59296200  | Si  | -0.72854100 | 1.64587100  | -1.88972900 |
| Si  | -1.26090800 | -0.17508300 | -2.35512500 | Si  | 1.18149100  | -1.57487300 | 1.94532500  |
| Si  | -1.29049200 | -0.68819200 | 2.65358800  | Si  | -0.78249200 | 2.84286400  | 0.18441200  |
| Si  | 1.54652000  | 2.23380700  | -1.05570200 | Si  | -0.72963400 | -2.31024100 | -1.37740300 |
| Si  | -1.49414200 | -1.85446900 | 0.62360100  | Si  | 0.86030900  | 0.76114600  | 2.34054000  |
| B   | -1.32284100 | 0.45241900  | -0.47444000 | B   | -0.39255600 | -0.40255500 | 0.87944400  |
| Si  | 0.53926000  | -1.79296300 | -2.43077400 | Si  | 2.85692200  | -1.43541700 | 0.24976300  |
| Si  | 0.36682700  | -2.83307500 | -0.26439400 | Si  | 3.40958900  | 0.92813400  | -0.38928500 |
| 15C |             |             |             | 15D |             |             |             |
|     | X           | Y           | Z           |     | X           | Y           | Z           |
| B   | 1.38634100  | 0.42263100  | -0.18729800 | B   | -1.36475800 | 0.79750800  | -0.56766100 |
| B   | 0.00036800  | 0.60760600  | 0.94457600  | B   | 0.21596400  | -1.38199200 | 0.42481400  |
| B   | -1.38727400 | 0.41460300  | -0.18635800 | B   | 0.03531500  | -0.24360500 | -0.96592100 |
| Si  | 1.61767900  | -2.17244700 | 0.11837000  | Si  | 1.18371800  | 1.53568900  | -1.11646100 |
| Si  | -1.19283500 | 2.42166400  | 0.45523800  | Si  | -1.87257200 | 1.29892700  | 1.33057300  |
| Si  | 1.55037900  | -0.39804500 | -2.03730000 | Si  | -1.61779600 | -2.61017100 | 0.28051900  |
| Si  | 2.07228600  | 0.68703100  | 1.81623600  | Si  | 1.90876200  | -0.44823700 | -2.10059700 |
| Si  | 0.00200400  | -1.87555000 | 1.71387100  | Si  | -1.83760600 | -0.54174300 | -2.02455300 |
| Si  | -2.07013700 | 0.67680200  | 1.81987000  | Si  | -1.20436200 | -1.21892600 | 2.02922800  |
| Si  | -1.20962700 | 1.94546200  | -1.88859200 | Si  | -3.08075300 | -0.52131000 | 0.11701400  |
| Si  | 1.18547200  | 2.42833900  | 0.45164600  | Si  | 1.72288500  | -0.70865400 | 1.82746500  |
| Si  | -1.61627000 | -2.16828800 | 0.11874600  | Si  | 2.24853500  | -1.97944700 | -0.07658200 |
| Si  | 1.20465100  | 1.94674000  | -1.89115000 | Si  | 0.07548300  | -2.23447000 | -1.52198600 |
| Si  | 0.00352500  | 0.06545600  | 3.04426600  | Si  | -0.85994800 | 2.90725600  | -0.33901000 |
| Si  | -1.54711400 | -0.39886000 | -2.03939700 | Si  | -0.93335500 | 1.79891700  | -2.41652900 |
| B   | 0.00363600  | -0.71878900 | -0.27841100 | B   | -0.01949100 | 0.36955500  | 0.64796800  |
| Si  | -3.29259700 | -0.51089900 | 0.02113600  | Si  | 1.49812100  | 1.77165900  | 1.25552400  |
| Si  | 3.29031300  | -0.50864400 | 0.02035500  | Si  | 3.24310200  | 0.33860700  | -0.00553400 |

**Table S3.** CCSD(T)//aug-cc-pVTZ energies for isomers of  $B_4Si_{4-15}^-$  clusters.

|             |              |              |
|-------------|--------------|--------------|
| $B_4Si_4^-$ | 4A           | 4B           |
|             | -1255.363026 | -1255.349767 |
|             | 4C           | 4D           |
|             | -1255.348797 | -1255.347817 |

|             |              |              |
|-------------|--------------|--------------|
| $B_4Si_5^-$ | 5A           | 5B           |
|             | -1544.453834 | -1544.43737  |
|             | 5C           | 5D           |
|             | -1544.437206 | -1544.428984 |

|             |              |              |
|-------------|--------------|--------------|
| $B_4Si_6^-$ | 6A           | 6B           |
|             | -1833.572431 | -1833.570003 |
|             | 6C           | 6D           |
|             | -1833.560286 | -1833.556028 |

|             |              |              |
|-------------|--------------|--------------|
| $B_4Si_7^-$ | 7A           | 7B           |
|             | -2123.076171 | -2123.073    |
|             | 7C           | 7D           |
|             | -2123.070498 | -2123.060494 |

|             |              |              |
|-------------|--------------|--------------|
| $B_4Si_8^-$ | 8A           | 8B           |
|             | -2412.405737 | -2412.399061 |
|             | 8C           | 8D           |
|             | -2412.398203 | -2412.397372 |

|             |              |              |
|-------------|--------------|--------------|
| $B_4Si_9^-$ | 9A           | 9B           |
|             | -2701.802517 | -2701.789986 |
|             | 9C           | 9D           |
|             | -2701.788043 | -2701.78398  |

|                |              |              |
|----------------|--------------|--------------|
| $B_4Si_{10}^-$ | 10A          | 10B          |
|                | -2991.205087 | -2991.196577 |
|                | 10C          | 10D          |
|                | -2991.192546 | -2991.189681 |

|                |              |              |
|----------------|--------------|--------------|
| $B_4Si_{11}^-$ | 11A          | 11B          |
|                | -3280.608385 | -3280.602256 |
|                | 11C          | 11D          |
|                | -3280.601042 | -3280.596903 |

|                |              |              |
|----------------|--------------|--------------|
| $B_4Si_{12}^-$ | 12A          | 12B          |
|                | -3570.021515 | -3570.008228 |
|                | 12C          | 12D          |
|                | -3570.000514 | -3569.998054 |

|                |              |             |
|----------------|--------------|-------------|
| $B_4Si_{13}^-$ | 13A          | 13B         |
|                | -3859.446024 | -3859.43699 |
|                | 13C          | 13D         |
|                | -3859.435012 | -3859.43301 |

|                |              |              |
|----------------|--------------|--------------|
| $B_4Si_{14}^-$ | 14A          | 14B          |
|                | -4148.868494 | -4148.858985 |
|                | 14C          | 14D          |
|                | -4148.856019 | -4148.855177 |

|                |              |              |
|----------------|--------------|--------------|
| $B_4Si_{15}^-$ | 15A          | 15B          |
|                | -4438.267423 | -4438.258951 |
|                | 15C          | 15D          |
|                | -4438.257888 | -4438.254909 |



**Table S4.** CCSD(T)//aug-cc-pVTZ energies for isomers of B<sub>4</sub>Si<sub>4-15</sub> clusters.

|                                |              |              |
|--------------------------------|--------------|--------------|
| B <sub>4</sub> Si <sub>4</sub> | 4A'          | 4B'          |
|                                | -1255.285248 | -1255.26716  |
|                                | 4C'          | 4D'          |
|                                | -1255.260468 | -1255.259624 |

|                                |              |              |
|--------------------------------|--------------|--------------|
| B <sub>4</sub> Si <sub>5</sub> | 5A'          | 5B'          |
|                                | -1544.370823 | -1544.366475 |
|                                | 5C'          | 5D'          |
|                                | -1544.356274 | -1544.351542 |

|                                |              |              |
|--------------------------------|--------------|--------------|
| B <sub>4</sub> Si <sub>6</sub> | 6A'          | 6B'          |
|                                | -1833.439035 | -1833.431593 |
|                                | 6C'          | 6D'          |
|                                | -1833.427173 | -1833.422529 |

|                                |              |              |
|--------------------------------|--------------|--------------|
| B <sub>4</sub> Si <sub>7</sub> | 7A'          | 7B'          |
|                                | -2123.076171 | -2123.070102 |
|                                | 7C'          | 7D'          |
|                                | -2123.069    | -2123.06499  |

|                                |             |              |
|--------------------------------|-------------|--------------|
| B <sub>4</sub> Si <sub>8</sub> | 8A'         | 8B'          |
|                                | -2412.31302 | -2412.306497 |
|                                | 8C'         | 8D'          |
|                                | -2412.30051 | -2412.297182 |

|                                |              |              |
|--------------------------------|--------------|--------------|
| B <sub>4</sub> Si <sub>9</sub> | 9A'          | 9B'          |
|                                | -2701.713433 | -2701.708604 |
|                                | 9C'          | 9D'          |
|                                | -2701.702964 | -2701.702988 |

|                                 |              |              |
|---------------------------------|--------------|--------------|
| B <sub>4</sub> Si <sub>10</sub> | 10A'         | 10B'         |
|                                 | -            | -2991.112842 |
|                                 | 2991.119779  |              |
|                                 | 10C'         | 10D'         |
| -                               | -2991.105297 |              |
| 2991.110006                     |              |              |

|                                 |              |              |
|---------------------------------|--------------|--------------|
| B <sub>4</sub> Si <sub>11</sub> | 11A'         | 11B'         |
|                                 | -3280.522803 | -3280.506601 |
|                                 | 11C'         | 11D'         |
|                                 | -3280.505003 | -3280.500387 |

|                                 |              |              |
|---------------------------------|--------------|--------------|
| B <sub>4</sub> Si <sub>12</sub> | 12A'         | 12B'         |
|                                 | -3569.927677 | -3569.924973 |
|                                 | 12C'         | 12D'         |
|                                 | -3569.914993 | -3569.912658 |

|              |              |              |
|--------------|--------------|--------------|
| $B_4Si_{13}$ | 13A'         | 13B'         |
|              | -3859.34235  | -3859.332123 |
|              | 13C'         | 13D'         |
|              | -3859.330703 | -3859.327823 |

|              |              |              |
|--------------|--------------|--------------|
| $B_4Si_{14}$ | 14A'         | 14B'         |
|              | -4148.772431 | -4148.763099 |
|              | 14C'         | 14D'         |
|              | -4148.760012 | -4148.758003 |

|              |              |              |
|--------------|--------------|--------------|
| $B_4Si_{15}$ | 15A'         | 15B'         |
|              | -4438.174449 | -4438.163963 |
|              | 15C'         | 15D'         |
|              | -4438.161983 | -4438.160131 |
